# Supplementary material for: Protocol to assess the impact of tobacco-induced volatile organic compounds on cardiovascular risk in a cross- sectional cohort: Cardiovascular Injury due to Tobacco Use study
Source: PubMed Central journal article supplement — BMJ Open. 2018 Mar 30;8(3):e019850. doi: 10.1136/bmjopen-2017-019850 (PMC5884372; doi:10.1136/bmjopen-2017-019850), 2018-03-30
Supplement: bmjopen-2017-019850.draft_revisions.pdf [file bmjopen-2017-019850.draft_revisions.pdf]

# BMJ Open

BMJ Open is committed to open peer review. As part of this commitment we make the peer review history of every article we publish publicly available.

When an article is published we post the peer reviewers' comments and the authors' responses online. We also post the versions of the paper that were used during peer review. These are the versions that the peer review comments apply to.

The versions of the paper that follow are the versions that were submitted during the peer review process. They are not the versions of record or the final published versions. They should not be cited or distributed as the published version of this manuscript.

BMJ Open is an open access journal and the full, final, typeset and author-corrected version of record of the manuscript is available on our site with no access controls, subscription charges or pay-per-view fees (<http://bmjopen.bmj.com>).

If you have any questions on BMJ Open's open peer review process please email [info.bmjopen@bmj.com](mailto:info.bmjopen@bmj.com)

# BMJ Open

## Assessing the Impact of Tobacco-Induced Volatile Organic Compounds on Cardiovascular Risk in a Cross-Sectional Cohort: Cardiovascular Injury Due to Tobacco Study

|                               |                                                                                                                                                                                                                                                                                                                                                                                                                                                                                                                                                                                                                                                                                                                                                                                                                                                                                                                                                                                                                                                                                                                                                                                                                                                                                                                                                                                                                                 |
|-------------------------------|---------------------------------------------------------------------------------------------------------------------------------------------------------------------------------------------------------------------------------------------------------------------------------------------------------------------------------------------------------------------------------------------------------------------------------------------------------------------------------------------------------------------------------------------------------------------------------------------------------------------------------------------------------------------------------------------------------------------------------------------------------------------------------------------------------------------------------------------------------------------------------------------------------------------------------------------------------------------------------------------------------------------------------------------------------------------------------------------------------------------------------------------------------------------------------------------------------------------------------------------------------------------------------------------------------------------------------------------------------------------------------------------------------------------------------|
| Journal:                      | <i>BMJ Open</i>                                                                                                                                                                                                                                                                                                                                                                                                                                                                                                                                                                                                                                                                                                                                                                                                                                                                                                                                                                                                                                                                                                                                                                                                                                                                                                                                                                                                                 |
| Manuscript ID                 | bmjopen-2017-019850                                                                                                                                                                                                                                                                                                                                                                                                                                                                                                                                                                                                                                                                                                                                                                                                                                                                                                                                                                                                                                                                                                                                                                                                                                                                                                                                                                                                             |
| Article Type:                 | Protocol                                                                                                                                                                                                                                                                                                                                                                                                                                                                                                                                                                                                                                                                                                                                                                                                                                                                                                                                                                                                                                                                                                                                                                                                                                                                                                                                                                                                                        |
| Date Submitted by the Author: | 05-Oct-2017                                                                                                                                                                                                                                                                                                                                                                                                                                                                                                                                                                                                                                                                                                                                                                                                                                                                                                                                                                                                                                                                                                                                                                                                                                                                                                                                                                                                                     |
| Complete List of Authors:     | Keith, Rachel; University of Louisville, Medicine; American Heart Association- Tobacco Regulation and Addiction Center<br>Fetterman, Jessica; Boston Medical Center, Vascular Biology Section, Whitaker Cardiovascular Institute; American Heart Association- Tobacco Regulation and Addiction Center<br>Shah, Jasmit; University of Louisville; American Heart Association- Tobacco Regulation and Addiction Center<br>O'Toole, Timothy; University of Louisville, Medicine; American Heart Association- Tobacco Regulation and Addiction Center<br>Nystoriak, Jessica; University of Louisville, Medicine; American Heart Association- Tobacco Regulation and Addiction Center<br>Holbrook, Monika; Boston Medical Center, Vascular Biology Section, Whitaker Cardiovascular Institute; American Heart Association- Tobacco Regulation and Addiction Center<br>Lorkiewicz, Pawel; University of Louisville, Medicine; American Heart Association- Tobacco Regulation and Addiction Center<br>Bhatnagar, Aruni; University of Louisville, Medicine; American Heart Association- Tobacco Regulation and Addiction Center<br>DeFilippis, Andrew; University of Louisville, Medicine; American Heart Association- Tobacco Regulation and Addiction Center<br>Hamburg, Naomi ; Boston University, Vascular Biology Section, Whitaker Cardiovascular Institute; American Heart Association- Tobacco Regulation and Addiction Center |
| Keywords:                     | smoking, tobacco, electronic cigarette, cardiovascular risk, vascular injury, cigarettes                                                                                                                                                                                                                                                                                                                                                                                                                                                                                                                                                                                                                                                                                                                                                                                                                                                                                                                                                                                                                                                                                                                                                                                                                                                                                                                                        |
|                               |                                                                                                                                                                                                                                                                                                                                                                                                                                                                                                                                                                                                                                                                                                                                                                                                                                                                                                                                                                                                                                                                                                                                                                                                                                                                                                                                                                                                                                 |

SCHOLARONE™  
Manuscripts

1  
2  
3 1 **Assessing the Impact of Tobacco-Induced Volatile Organic Compounds on**  
4  
5 2 **Cardiovascular Risk in a Cross-Sectional Cohort: Cardiovascular Injury Due to**  
6  
7 **Tobacco Study**  
8  
9

10 4 Rachel J. Keith, Jessica L. Fetterman, Daniel W. Riggs, Tim O'Toole, Jessica Nystoriak,  
11  
12 5 Monica Holbrook, Pawel Lorkiewicz, Aruni Bhatnagar, Andrew DeFilippis\*, Naomi M.  
13  
14 6 Hamburg\*

15  
16  
17 7 Rachel J. Keith-Division of Cardiovascular Medicine, University of Louisville School of  
18  
19 8 Medicine 580 S. Preston St. Louisville KY, 40202 [rachel.keith@louisville.edu](mailto:rachel.keith@louisville.edu) 502-852-  
20  
21 9 4211

22  
23  
24 10 Jessica L. Fetterman- Vascular Biology Section, Whitaker Cardiovascular Institute,  
25  
26 11 Boston University School of Medicine Evans Building, Boston, MA USA

27  
28 12 Jasmit Shah- University of Louisville School of Medicine Louisville, KY USA

29  
30  
31 13 Timothy O-Toole- Division of Cardiovascular Medicine, University of Louisville School of  
32  
33 14 Medicine Louisville, KY USA

34  
35 15 Jessica L. Nystoriak- Division of Cardiovascular Medicine, University of Louisville  
36  
37 16 School of Medicine Louisville, KY USA

38  
39  
40 17 Monika Holbrook- Vascular Biology Section, Whitaker Cardiovascular Institute, Boston  
41  
42 18 University School of Medicine Boston, MA USA

43  
44 19 Pawel Lorkiewicz- Division of Cardiovascular Medicine, University of Louisville School  
45  
46 20 of Medicine Louisville, KY USA

47  
48  
49 21 Aruni Bhatnagar- Division of Cardiovascular Medicine, University of Louisville School of  
50  
51 22 Medicine Louisville, KY USA

1  
2  
3 23 Andrew P. DeFilippis- Division of Cardiovascular Medicine, University of Louisville  
4  
5 24 School of Medicine Louisville, KY USA (co-senior author)  
6

7  
8 25 Naomi M. Hamburg- Vascular Biology Section, Whitaker Cardiovascular Institute,  
9  
10 26 Boston University School of Medicine Boston, MA USA (co-senior author)  
11  
12  
13

14  
15 28 **Word Count: 2581**  
16  
17  
18

19 30 **ABSTRACT**

20  
21 31 **Introduction:** Tobacco use leads to increased mortality, the majority of which is  
22  
23 32 attributed to cardiovascular disease. Despite this knowledge, the early cardiovascular  
24  
25 33 impact of tobacco product use is not well understood. Tobacco use increases exposure  
26  
27 34 to harmful and potentially harmful constituents including volatile organic compounds  
28  
29 35 (VOCs) such as acrolein and crotonaldehyde, which may contribute to cardiovascular  
30  
31 36 risk. The link between exposure patterns, risk profiles and demographic distribution of  
32  
33 37 tobacco product users, particularly users of new and emerging products, are not well  
34  
35 38 known. Therefore, we designed the Cardiovascular Injury due to Tobacco Use (CITU)  
36  
37 39 study to assess population characteristics, demographic features, exposure patterns  
38  
39 40 and cardiovascular risk in relation to tobacco.  
40  
41  
42  
43

44 41 **Methods and analysis:** This is a cross-section observational study conducted in  
45  
46 42 Boston MA and Louisville KY from 2014 through 2018. Healthy participants 21 to 45  
47  
48 43 years of age who use tobacco products, including ENDS, or who never used tobacco  
49  
50 44 are being recruited. The study aims to recruit an evenly split cohort of African  
51  
52 45 Americans and Caucasians that is sex balanced for evaluation of self-reported tobacco  
53  
54  
55  
56

1  
2  
3 46 exposure, VOC exposure and tobacco-induced injury profiling. Detailed information  
4  
5 47 about participant's demographics, health status and lifestyle is also collected.  
6

7  
8 48 **Ethics and dissemination:** The study protocol was approved institutional review  
9  
10 49 boards at both participating universities. All study protocols will protect participant  
11  
12 50 confidentiality. Results from the study will be disseminated via peer-reviewed journals  
13  
14 51 and presented at scientific conferences.  
15  
16

### 17 52 18 19 53 **Strengths and limitations**

- 20  
21 54 • Young age to allow for evaluation of early stage disease (e.g. inflammation,  
22  
23 55 endothelial function) as opposed to end stage clinical consequence (e.g.  
24  
25 56 myocardial infarction)
- 26  
27 57 • Diverse tobacco product use allows for assessment of a wide range of tobacco-  
28  
29 58 induced VOC exposure
- 30  
31 59 • All study visits are in English introducing selection bias
- 32  
33 60 • Data will inform regulatory agencies on the cardiovascular health effects of  
34  
35 61 multiple tobacco products and the contribution of HPHCs  
36  
37  
38  
39  
40  
41  
42

43 63 **Keywords:** Tobacco, smoking, electronic cigarette, vascular injury, cardiovascular risk,  
44  
45 64 cigarettes.  
46  
47  
48

## 49 66 **INTRODUCTION**

50  
51  
52 67 Tobacco product use and smoking are the leading causes of preventable deaths  
53  
54 68 throughout the world. Of those deaths, one-third are attributed to cardiovascular disease  
55  
56

1  
2  
3 69 (CVD)<sup>1</sup>. The cardiovascular (CV) effects of tobacco exposure can include  
4  
5 70 atherogenesis, vascular injury, thrombosis, arrhythmias and inflammation<sup>2</sup> and may be  
6  
7 71 attributable to the many different harmful and potentially harmful constituents (HPHCs)  
8  
9  
10 72 present in tobacco products.

11  
12 73 The HPHCs found in tobacco products include volatile organic compounds  
13  
14 74 (VOCs) of which reactive aldehydes, such as acrolein and crotonaldehyde, are likely the  
15  
16 75 most significant contributors to CV toxicity<sup>3</sup>. High levels of aldehydes are present in  
17  
18 76 cigarette smoke<sup>4 5</sup> as well as smokeless tobacco (ST)<sup>6</sup>. Risk assessments, using the  
19  
20 77 prevalence of each individual chemical weighed by its potency, suggest that the non-  
21  
22 78 cancer risk of smoking is dominated by acrolein, which contributes 40-100 times more  
23  
24 79 to risk than any other chemical present in cigarette smoke<sup>3</sup>.

25  
26  
27  
28 80 Although HPHCs, including VOC reactive aldehydes, have been suspected to be  
29  
30 81 major contributors to the toxicity of cigarette smoke for over 4 decades, their  
31  
32 82 contribution to CV injury and early CVD risk has not been rigorously evaluated.  
33  
34 83 Experimental studies in animal models suggest that because of low aldehyde-  
35  
36 84 metabolizing capacity, CV tissues are highly sensitive to aldehydes and exposure to low  
37  
38 85 levels of aldehydes can induce CV injury and accelerate CVD<sup>7-19</sup>. The WHO Study  
39  
40 86 Group on Tobacco Product Regulation (TobReg) has marked acrolein, a VOC, along  
41  
42 87 with 8 other cigarette constituents for monitoring and regulation<sup>20</sup> and the U.S.  
43  
44 88 Environmental Protection Agency lists Acrolein as one of most hazardous air  
45  
46 89 pollutants<sup>21</sup>. Nevertheless, the contribution of tobacco induced VOCs, including acrolein  
47  
48 90 or other aldehydes, toward CV toxicity in humans has not been fully assessed. Greater  
49  
50 91 understanding of how aldehydes affect cardiovascular health and disease will provide  
51  
52  
53  
54  
55  
56  
57  
58  
59  
60

1  
2  
3 92 new avenues for evaluating the toxicity of cigarette smoke and for assessing the  
4  
5 93 injurious potential of new and emerging tobacco products, such as ENDS, which may  
6  
7 94 also contain VOCs including acrolein<sup>22-24</sup>.  
8  
9

10 95 The latency period between tobacco exposure and the development of major  
11  
12 96 clinical adverse health effects is long, therefore biomarkers that provide information over  
13  
14 97 a shorter period allow for the identification of harm decades before clinical outcome data  
15  
16 98 is available. Thus, the Cardiovascular Injury due To Tobacco Use (CITU) study  
17  
18 99 evaluates the association of the urinary metabolites of 18 parent VOCs from tobacco  
19  
20 100 exposure with a comprehensive set of CV biomarkers representative of early disease  
21  
22 101 and predictive of future CV events.<sup>25</sup>  
23  
24  
25

## 26 102 **METHODS AND DESIGN**

### 27 103 **Overall design**

28  
29  
30 104 The CITU study is an investigator-initiated cross-sectional observational study of  
31  
32 105 around 500 healthy participants 21 to 45 years of age who are never or current tobacco  
33  
34 106 product users in two urban areas at Boston University (BU) and University of Louisville  
35  
36 107 (UofL) (Boston, MA and Louisville, KY) designed to evaluate CV toxicity due to tobacco  
37  
38 108 product use, with correlations to VOCs found in the tobacco products (Figure 1).  
39  
40  
41  
42  
43

### 44 110 **Figure 1. Cardiovascular Injury due to Tobacco Use**

45  
46  
47 111  
48  
49 112 *CITU is designed to assess how tobacco related VOC exposure contributes to*  
50  
51 113 *cardiovascular risk factors. Our exposure measurements include a panel of 23 urinary*  
52  
53 114 *metabolites of 18 parent VOCs and tobacco use patterns. Cardiovascular phenotyping*  
54  
55  
56

1  
2  
3 115 *includes measures of injury, risk, vascular biomarkers and early vascular dysfunction.*  
4  
5 116 *Tobacco use included use of traditional cigarettes, smokeless tobacco, waterpipe*  
6  
7 117 *tobacco (hookah), electronic nicotine devices (ENDS), little cigars, cigarillos, pipes,*  
8  
9 118 *cigars or any other form of tobacco that is available. Enrollment began in July 2014 and*  
10  
11 119 *is ongoing.*  
12  
13

## 14 120 **Participant Eligibility Criteria**

17 121 The goal of the study is to examine the impact of tobacco products on healthy  
18  
19 122 young adults who could be classified as a current tobacco product users (Defined in  
20  
21 123 table 1), or never-users (does not have lifetime use of any tobacco product); therefore  
22  
23 124 we excluded participants if they had: 1) diagnosis of diabetes (HbA1c >7.0 or treatment  
24  
25 125 for diabetes), hypertension (systolic blood pressure >140 mm Hg or diastolic blood  
26  
27 126 pressure >90 mm Hg), hypothyroidism or hyperthyroidism, inflammatory conditions such  
28  
29 127 as lupus or inflammatory bowel disease, HIV/AIDS, hepatitis, liver disease, anemia,  
30  
31 128 cancer of any type or another medical condition that might compromise the successful  
32  
33 129 completion of the study; 2) recipients of organ transplant or renal replacement therapy;  
34  
35 130 3) individuals that are taking the following medications: immunosuppressant agents  
36  
37 131 estrogen, testosterone, anti TNF agents, certain biologics, Procrit, statins, beta-blockers  
38  
39 132 or other cardiovascular medicine; 4) individuals using nutraceuticals or anabolic steroids  
40  
41 133 beyond the recommended daily allowance; 5) body weight less than 100 pounds; 6)  
42  
43 134 pregnant women; 7) prisoners and other vulnerable populations; and 8) active illness or  
44  
45 135 infection. Participants are rescheduled or considered screen-failures and excluded from  
46  
47 136 the study if symptomatic of an acute illness, i.e. viral upper respiratory infection, on  
48  
49 137 study date.  
50  
51  
52  
53  
54  
55  
56  
57  
58  
59  
60



138 **Table 1. Tobacco product use classifications**

| Classification         | Qualification                                                       |
|------------------------|---------------------------------------------------------------------|
| Never                  | Does not meet lifetime limits for any tobacco use (see below)       |
| Smoker                 | >100 lifetime cigarettes and current use for the past year          |
| Smokeless Tobacco User | >20 lifetime dips or chews and current use for the past year        |
| Cigar/Cigarillo User   | >20 lifetime cigars or cigarillos and current use for the past year |
| Pipe User              | >20 lifetime pipefuls and current use for the past year             |
| ENDS User              | >20 lifetime vape sessions and current use for the past year        |
| Hookah User            | >20 lifetime hookah sessions and current use for the past year      |

139 *Study participants are screened prior to enrollment for current and past tobacco product*  
 140 *use. Participants are characterized and assigned a use group based on self-reported*  
 141 *patterns collected during the study visits.*

## 142 Overall Study Procedure

143 Study participants fast for 8 h from food and 6 h from tobacco prior to the visit. All  
 144 study visits occur before 11AM to limit effects due to circadian changes. All vascular  
 145 function studies are completed after 10 min of supine positioning. All vascular studies  
 146 are sent to the BU central lab for analysis. BU biologic samples have minimal  
 147 processing and are shipped overnight to the UofL central laboratory at the completion of  
 148 each study visit. Samples obtained at UofL are processed to a similar stage, then held  
 149 overnight prior to analysis for standardization of time to measurement for all samples.

150 Study visits include a structured interview on demographics, socioeconomics,  
 151 lifestyle, health, family history of heart disease, allergies, and tobacco use. All surveys  
 152 are collected and kept in Research Electronic Data Capture (REDCap), a secure web  
 153 application for building and managing online surveys and databases.

## 154 Exposure Variables

155 Tobacco Product Use & Particulate Matter Exposure

1  
2  
3 156 Comprehensive tobacco product exposure is assessed using a modified version  
4  
5 157 of the National Health Interview survey on tobacco use<sup>26</sup>. The survey is modified to  
6  
7 158 include detailed information on electronic nicotine devices (ENDs) and other new or  
8  
9 159 emerging tobacco products. Residential addresses are collected for assessment of  
10  
11 160 ambient airborne particulate matter (PM<sub>2.5</sub>) exposure and future correction of overall  
12  
13 161 exposure. PM<sub>2.5</sub> data from the day of the study visit, and 3 and 5 days prior to the study  
14  
15 162 is collected from publicly available data associated with EPA monitoring stations. Other  
16  
17 163 exposure variables, including occupation, are collected through interview.  
18  
19  
20  
21

#### 22 164 VOC Measurements

23  
24 165 Standard clean catch urine specimens are obtained from participants. We have  
25  
26 166 developed a robust Core Lab that utilizes mass spectrometry procedures adopted from  
27  
28 167 the Centers for Disease Control and Prevention (CDC) protocols, to quantify 23 urinary  
29  
30 168 metabolites of tobacco smoking related toxins (aldehydes and other VOCs), including  
31  
32 169 acrolein<sup>27</sup> (**Table 2**). The concentration values of analytes are then normalized to  
33  
34 170 urinary creatinine levels measured using Infinity Creatinine Reagent (Thermo Fisher  
35  
36 171 Scientific, MA) on a COBAS MIRA-plus analyzer (Roche, NJ).  
37  
38  
39

#### 40 172 **Table 2 Exposure Variables (Please see end of article)**

| <i>Parent compound</i> | <i>VOC metabolite</i>                     | <i>Common abbr.</i> |
|------------------------|-------------------------------------------|---------------------|
| Acetaldehyde           | Acetic acid/Acetate                       | ACETATE             |
| Acrolein               | N-Acetyl-S-(2-carboxyethyl)-L-cysteine    | CEMA                |
|                        | N-Acetyl-S-(3-hydroxypropyl)-L-cysteine   | 3HPMA               |
| Acrylamide             | N-Acetyl-S-(2-carbamoyl-ethyl)-L-cysteine | AAMA                |

|                                                  |                                                    |         |
|--------------------------------------------------|----------------------------------------------------|---------|
|                                                  | N-Acetyl-S-(2-carbamoyl-2-hydroxyethyl)-L-cysteine | GAMA    |
| Acrylonitrile                                    | N-Acetyl-S-(2-cyanoethyl)-L-cysteine               | CYMA    |
| Acrylonitrile, vinyl chloride,<br>ethylene oxide | N-Acetyl-S-(2-hydroxyethyl)-L-cysteine             | HEMA    |
| Anabasine                                        | Anabasine (free)                                   | ANB     |
| Anatabine                                        | Anatabine (free)                                   | ANTB    |
| Benzene                                          | N-Acetyl-S-(phenyl)-L-cysteine                     | PMA     |
|                                                  | trans, trans-Muconic acid                          | MU      |
| 1-Bromopropane                                   | N-Acetyl-S-(n-propyl)-L-cysteine                   | BPMA    |
| 1,3-Butadiene                                    | N-Acetyl-S-(3,4-dihydroxybutyl)-L-cysteine         | DHBMA   |
|                                                  | N-Acetyl-S-(1-hydroxymethyl-2-propenyl)-L-cysteine | MHBMA1  |
|                                                  | N-Acetyl-S-(2-hydroxy-3-butenyl)-L-cysteine        | MHBMA2  |
|                                                  | N-Acetyl-S-(4-hydroxy-2-buten-1-yl)-L-cysteine     | MHBMA3  |
| Carbon-disulfide                                 | 2-Thioxothiazolidine-4-carboxylic acid             | TTCA    |
| Crotonaldehyde                                   | N-Acetyl-S-(3-hydroxypropyl-1-methyl)-L-cysteine   | HPMMA   |
| Cyanide                                          | 2-Aminothiazoline-4-carboxylic acid                | ATCA    |
| N,N-Dimethylformamide                            | N-Acetyl-S-(N-methylcarbamoyl)-L-cysteine          | AMCC    |
| Ethylbenzene, styrene                            | Phenylglyoxylic acid                               | PGA     |
| Formaldehyde                                     | Formate                                            | FORMATE |
| Nicotine                                         | Nicotine                                           | NIC     |
|                                                  | Cotinine                                           | COT     |
|                                                  | 3-Hydroxycotinine                                  | 3HC     |

|                     |                                                   |            |
|---------------------|---------------------------------------------------|------------|
| Propylene oxide     | N-Acetyl-S-(2-hydroxypropyl)-L-cysteine           | 2HPMA      |
| Styrene             | N-Acetyl-S-(1-phenyl-2-hydroxyethyl)-L-cysteine + | PHEMA      |
|                     | N-Acetyl-S-(2-phenyl-2-hydroxyethyl)-L-cysteine   |            |
|                     | Mandelic acid                                     | MA         |
| Tetrachloroethylene | N-Acetyl-S-(trichlorovinyl)-L-cysteine            | TCVMA      |
| Toluene             | N-Acetyl-S-(benzyl)-L-cysteine                    | BMA        |
| Trichloroethylene   | N-Acetyl-S-(1,2-dichlorovinyl)-L-cysteine         | 1,2DCVMA   |
|                     | N-Acetyl-S-(2,2-dichlorovinyl)-L-cysteine         | 2,2DCVMA   |
| Xylene              | N-Acetyl-S-(2,4-dimethylphenyl)-L-cysteine +      | DPMA       |
|                     | N-Acetyl-S-(2,5-dimethylphenyl)-L-cysteine +      |            |
|                     | N-Acetyl-S-(3,4-dimethylphenyl)-L-cysteine        |            |
|                     | 2-Methylhippuric acid                             | 2MHA       |
|                     | 3-Methylhippuric acid + 4-Methylhippuric acid     | 3MHA+ 4MHA |

173

174 *Urine is analyzed for 23 metabolites of 18 parent VOCs and tobacco alkaloids by UPLC-*  
 175 *MS/MS. Analytes are listed as parent, metabolite and their common abbreviation.*

176

### 177 **Circulating Markers of Cardiovascular Injury**

178 To assess tobacco product-induced cardiovascular toxicity, we examine  
 179 endothelial function, inflammatory mediators, biomarkers, and thrombosis. CV risk is  
 180 defined through measurements of circulating angiogenic cells, lipid profile, and glucose  
 181 metabolism<sup>25 28 29</sup>. Plasma (BD367863 and BD366415) and serum (BD367814)  
 182 samples are obtained from all participants for laboratory testing and long term

183 biobanking. Whole blood (BD366415) is obtained for flow cytometry on fresh samples at  
 184 UofL pathology core. BU biologic samples have minimal processing and are shipped  
 185 overnight to the UofL central laboratory at the completion of each study visit. Samples  
 186 obtained at UofL are processed to a similar stage, then held overnight prior to analysis  
 187 to standardize the time to measurement for all samples. The UofL central laboratory, as  
 188 previously reported, will complete fasting and biomarker measurements (**Table 3**), with  
 189 the exception of cytomics<sup>13 30</sup>. For cytomic measurements, mononuclear cells are  
 190 labeled with the peripheral blood phenotyping panel kit (Fluidigm). Samples are shipped  
 191 at 4 degree C to Core Lab facilities at the University of Rochester for Mass cytometric  
 192 analysis.

193 **Table 3 Blood analysis**

**Fasting Measurements**

LDL cholesterol, HDL cholesterol, total cholesterol, triglycerides, glucose, uric acid, SAA and fibrinogen

**Biomarkers**

CAC (1-15)<sup>1</sup>, Platelet-monocyte aggregates, MP (1-5)<sup>1</sup>, PF4, t-PA, TxA2, Factor VII, IL-6, CRP, D-dimer, PAI-1, s-ICAM-1, s-VCAM, s-thrombomodulin, s-TNFR1, MMP-2, MMP-3, MMP-9, cytomics, endothelin, E-selectin and P-selectin

1: Fifteen different CAP subpopulations and 5 subtypes of microparticles were measured by flow cytometry.

194 *All participants who complete the study visit will have blood samples taken and*  
 195 *processed. Flow cytometric analysis is completed on fresh samples. All other analysis*  
 196 *will be completed on biobanked samples in batches LDL= low density lipoprotein. HDL=*  
 197 *high density lipoprotein. SAA= serum amyloid A. CAC= circulating angiogenic cells.*  
 198 *MP= microparticles. PF4= Platelet factor 4. t-PA= tissue plasminogen activator.*  
 199 *TxA2=Thromboxane A. IL-6= Interleukin 6. CRP= C-reactive protein. PAI=--*  
 200 *Plasminogen activator. s- ICAM- soluble intercellular adhesion protein inhibitor. s-*

201 *VCAM= soluble vascular adhesion protein. TNFR1= Tumor necrosis factor receptor 1.*

202 *MMP- Matrix metalloproteinase.*

### 203 **Non-Invasive Vascular Function Testing**

204 Smoking, is associated with endothelial damage and vascular dysfunction<sup>31 32</sup>.

205 Endothelial cells are exposed to circulating toxins and measures of endothelial function  
206 are reflective of cardiovascular injury<sup>33</sup>. Thus, we examine the non-invasive endothelial  
207 vasodilator function using flow-mediated vasodilation<sup>34 35</sup>, arterial stiffness with carotid-  
208 femoral and carotid-radial pulse wave velocity<sup>36</sup>, and peripheral vascular function with  
209 ankle brachial index. All vascular imagers were trained at BU. Similar equipment and  
210 software is used at both sites. All vascular studies are sent to the BU central lab for  
211 analysis.

### 212 **Anthropometric measures**

213 Anthropometric measures included height, weight, waist and hip circumference  
214 and body fat. All anthropometric measures are completed twice and the average  
215 recorded. Standing height measurements are completed on a fixed stadiometer. Weight  
216 measurements are completed on a digital scale to the nearest tenth of a pound. Waist  
217 circumference is measured at the level of the umbilicus to the nearest tenth of a  
218 centimeter. Hip circumference is measured at the maximal protrusion of the gluteal  
219 muscle to the nearest tenth of a centimeter. Body fat percentage is calculated by the  
220 bioelectrical impedance measured with the Omron fat loss monitor (HBF-306C).

### 221 **DATA ANALYSIS**

222 We expect that from this study we will be able to identify specific biomarkers of  
223 cardiovascular injury due to tobacco use and the relationship of these biomarkers to

1  
2  
3 224 specific measures of tobacco exposure. For instance, we will identify which biomarkers  
4  
5 225 are affected by tobacco use, and which ones are most sensitive; including their dose-  
6  
7 226 dependence. Additionally we will examine the extent to which biomarkers are  
8  
9  
10 227 associated with exposure to nicotine versus exposure to HPHC of tobacco like  
11  
12 228 aldehydes.

13  
14 229 All statistical analysis will be performed using SAS version 9.4 software (SAS  
15  
16  
17 230 Institute, Inc., Cary, North Carolina), and a two-sided p-value of <0.05 will be considered  
18  
19 231 significant for any statistical test. Demographics and other baseline characteristics will  
20  
21 232 be summarized according to product group. The primary outcomes will be analyzed  
22  
23 233 using multiple regression techniques. Appropriate Interaction variables will be tested for  
24  
25  
26 234 in the regression models and subgroup analyses will be conducted according to the  
27  
28 235 following factors: significant interactions, sex, age, race, tobacco product group.  
29  
30 236 Multiple imputation method will be used for missing data where appropriate. Sensitivity  
31  
32 237 analysis using different analytic approaches, such as generalized linear models, as well  
33  
34 238 as considering different covariate adjustments, will be used to build concordant results.

35  
36  
37 239 The dose-dependence of the changes in biomarkers will be determined by  
38  
39 240 analyzing the data obtained from individuals that are exposed to different doses of a  
40  
41 241 single product (e.g. smoking 0, <15, 15-20 and >20 cigarettes per day) and by  
42  
43 242 comparing between tobacco products that have different doses of HPHC constituents.  
44  
45 243 In the US the average cigarettes per day is between 15-20<sup>37</sup> and therefore this dose  
46  
47 244 range distribution is reflective of general population exposure. Comparisons of the  
48  
49 245 effects of novel tobacco products and smoking will be informative of the relative toxicity  
50  
51 246 of the two products.  
52  
53  
54  
55  
56  
57  
58  
59  
60

1  
2  
3 247 We believe that the methods employed in the current project are exquisitely  
4  
5 248 sensitive and responsive to even low dose insults such as ambient air pollution<sup>13</sup>  
6  
7  
8 249 allowing us to quantify tobacco product-induced changes with high precision. Moreover,  
9  
10 250 levels of acrolein exposure vary between different individuals due to difference in puffing  
11  
12 251 intensity and the time a cigarette is left smoldering. Thus, direct measurements of  
13  
14 252 acrolein metabolites afford better estimates of acrolein exposure than machine yields.  
15  
16  
17 253 We expect to obtain wide variations in acrolein/crotonaldehyde exposure which will  
18  
19 254 enable us to construct a dose-response relationship and identify which injury  
20  
21 255 biomarkers are associated with aldehyde exposure and whether high levels of exposure  
22  
23 256 are associated with high levels of injury, despite similar nicotine delivery.  
24  
25

26 257 We consider three major factors for balancing sample selection: age, gender,  
27  
28 258 and race. Given that very few females use e-cigarette, only males will be enrolled in  
29  
30  
31 259 this group. With the balanced design to determine the main effects and interactions in  
32  
33 260 selected scenarios, we justify the sample size. The analysis plan is primarily based on  
34  
35 261 evaluating the effect of tobacco exposure on endothelial function (FMD), and the main  
36  
37 262 biomarkers, EPCs, and platelet-monocyte aggregates (PMA). The sample size is  
38  
39  
40 263 justified in terms of the primary dependent measure, FMD, given the potential  
41  
42 264 importance of this variable as a direct measure of the impact of tobacco exposure. The  
43  
44 265 main comparisons are between non-tobacco users and tobacco users. Due to one  
45  
46  
47 266 control group, we will conservatively adjust our  $\alpha$  (significance level) using a Bonferroni  
48  
49 267 correction, and we will set  $\alpha=0.01$ . Based on preliminary data for FMD, we have  
50  
51 268 observed mean  $\pm$  SD in smoker and nonsmoker groups to be  $4.0 \pm 1.6$  and  $6.8 \pm 1.0$ ,  
52  
53  
54 269 respectively. We consider at least 25% (mean FMD=3.0 from 4.0) reduction from  
55  
56  
57  
58  
59  
60



smokers to non-smokers is meaningful. Using a two sample, one-sided t test with an  $\alpha$  of 0.01 and 80% power ( $1-\beta$ ), assuming a common SD of 1.3, we will need 34 evaluable subjects in each group. To examine dose response, smokers will be recruited in 3 groups (<15, 15-20 and >20 CPD). We will recruit 40 participants in each group; total group size = 120 participants. In **Table 4** we provide estimable effect size for different outcome measures.

**Table 4 Minimal Detectable Differences in Endpoints at  $\alpha=0.01$  and Power=80%**

| Variable                           | Non-smokers     | Smokers          | n  | p     | Ref           | MDD                  |
|------------------------------------|-----------------|------------------|----|-------|---------------|----------------------|
| <b>Primary Functional Outcome</b>  |                 |                  |    |       |               | 278                  |
| FMD                                | 6.8 ± 1%        | 4.0 ± 1.6%       | 10 | <0.05 | <sup>32</sup> | 1.0 <sup>279</sup>   |
| <b>Primary Biomarkers</b>          |                 |                  |    |       |               | 280                  |
| EPC                                | 25 ± 5 cell/ml  | 10 ± 3 cells/ml  | 24 | 0.037 | <sup>38</sup> | 3.1 <sup>281</sup>   |
| PMA                                | 19.7 ± 8.6%     | 26.6 ± 9%        | 25 | 0.02  | <sup>39</sup> | 7.0 <sup>282</sup>   |
| EMP                                | 1.1 ± 0.4       | 0.5 ± 0.2        | 32 | <0.05 | <sup>40</sup> | 0.2 <sup>283</sup>   |
| <b>Other Biochemical Variables</b> |                 |                  |    |       |               | 284                  |
| PF4                                | 3.9 ± 1.2 IU/ml | 5.0 ± 2.6 IU/ml  | 12 | <0.05 | <sup>41</sup> | 2.0 <sup>285</sup>   |
| tPA                                | 3.0 ± 0.6 ng/ml | 4.3 ± 2.0 ng/ml  | 20 | <0.05 | <sup>42</sup> | 1.6 <sup>286</sup>   |
| TxA <sub>2</sub>                   | 2.2 ± 0.1 pg/ml | 3.3 ± 0.02 pg/ml | 12 | <0.05 | <sup>43</sup> | 0.016 <sup>287</sup> |

PMA: Platelet  
- monoc  
yte

aggregates; EMP: Endothelial microparticles (CD62+/CD31+); MDD: minimal detectable difference. Values are mean ± SD

## ETHICS AND DISSEMINATION

1  
2  
3 292 The CITU study was approved at each institution by their institutional review  
4  
5 293 board (BU #H-32613 and UofL #13.0590) and all participants provide written consent.  
6  
7  
8 294 No study related procedures will be completed until after participant consent.  
9

10 295 Participants for the CITU study are being recruited in both Boston, MA and  
11  
12 296 Louisville KY. The two populations show significant differences, therefore recruitment at  
13  
14 297 two sites will ensure a range more reflective of the general population. Although overall  
15  
16 298 racial and ethnic demographics for both cities show a clear majority of Caucasians  
17  
18 299 (70%) and despite smokers typically male, we strive to, and currently are successful in,  
19  
20 300 recruiting a population that was gender balanced and almost evenly split between  
21  
22 301 Caucasian and African Americans. Despite this balanced recruitment, e-cigarette users  
23  
24 302 have been reported as predominantly Caucasian and male<sup>44</sup>, and thus far our  
25  
26 303 recruitment mirrors these demographics. We expect very few Hispanic/Latino's to  
27  
28 304 participate, due to data suggesting tobacco use, including ENDS, tends to be lower  
29  
30 305 among Hispanic's/Latino's <sup>44 45</sup>. Thus we have also opted to only recruit English  
31  
32 306 speakers. We have carefully develop our recruitment strategy and exclusion criteria to  
33  
34 307 protect vulnerable populations, which is important since many report a lower  
35  
36 308 socioeconomic status and educational level in smokers in addition to higher rates of  
37  
38 309 reported alcohol and drug use <sup>46 47</sup>.  
39

40 310 Our study is an observational study where participants have already assumed  
41  
42 311 the risk of using tobacco. Study procedures pose minimal risk. Given the known harms  
43  
44 312 associated with smoking, we will provide information on tobacco treatment when  
45  
46 313 requested by the participant. Participant information is de-identified for analysis and  
47  
48 314 reported in aggregate to protect privacy.  
49  
50  
51  
52  
53  
54  
55  
56  
57  
58  
59  
60

1  
2  
3 315 Completion of these studies will enable a greater understanding of the biological  
4  
5 316 responses to use of a variety of tobacco products. Specifically, they will help to identify  
6  
7 317 the constituents of these products; and how a panel of exposure and CV injury  
8  
9 318 biomarkers are associated with these different constituents. This data will be available  
10  
11 319 to the FDA and could help guide new policy measures to reduce or eliminate the  
12  
13 320 harmful components of tobacco smoke and other nicotine products. The study is  
14  
15 321 dedicated to the rapid dissemination of their rigorously characterized and well-controlled  
16  
17 322 research findings to the public in the form of peer-reviewed publications. Subsequent to  
18  
19 323 the initial full-length manuscript publications of the resources generated with funding  
20  
21 324 from this program, the study will make them available to interested and qualified  
22  
23 325 investigators upon written request. The study will provide relevant protocols of published  
24  
25 326 data, upon request (presuming prior publication by the Center members). Participants  
26  
27 327 will be provided a summary of the results as they become available. Finally press  
28  
29 328 releases of relevant findings will inform the general population.  
30  
31  
32  
33  
34  
35  
36  
37

### 330 LIST OF ABBREVIATIONS

331 ABI- Ankle Brachial Index  
332 CAC= circulating angiogenic cells  
333 CRP= C-reactive protein  
334 CVD- Cardiovascular disease  
335 ENDS- Electronic nicotine Device (i.e. e-cigarette)  
336 FACS- Fluorescence-activated cell sorting  
337 FMD- Flow mediated dilation

1  
2  
3 338 HDL= high density lipoprotein  
4

5 339 IL-6= Interleukin 6  
6

7 340 MMP- Matrix metalloproteinase  
8

9 341 MP= micoparticles  
10

11 342 PAI=- Plasminogen activator  
12

13 343 PF4= Platelet factor 4  
14

15 344 PWV- Pulse wave velocity  
16

17 345 SAA= serum amyloid A  
18

19 346 s-ICAM- soluble intercellular adhesion protein inhibitor  
20

21 347 s-VCAM= soluble vascular adhesion protein  
22

23 348 TNFR1= Tumor necrosis factor receptor 1  
24

25 349 t-PA= tissue plasminogen activator  
26

27 350 TxA2=Thromboxane A  
28

29 351 VOC- Volatile organic compound  
30

31 352 W:H- ratio: Waist to hip ratio  
32

33 353  
34

35  
36  
37  
38  
39  
40 **AUTHORS CONTRIBUTIONS**

41  
42 355 Rachel Keith- Study design, study recruitment, study visits, statistical analysis and  
43

44 356 manuscript preparation. Jessica Fetterman- study recruitment, study visits, manuscript  
45

46 357 preparation and editing. Dan Riggs- statistical analysis, manuscript preparation and  
47

48 358 editing. Tim O'Toole- Biomarker measurements, manuscript preparation and editing.  
49

50 359 Jessica Nystoriak- study recruitment and study visits. Monica Holbrook- study  
51

52 360 recruitment and study visits. Pawel Lorkiewicz- VOC measurements and manuscript  
53  
54  
55  
56

1  
2  
3 361 preparation. Aruni Bhatnagar- Study design, study funding and manuscript editing.  
4  
5 362 Andrew DeFilippis- Human subject assessment planning, manuscript preparation and  
6  
7 363 editing. Naomi M. Hamburg- Study design, study funding, vascular core, manuscript  
8  
9 364 preparation and editing.  
10  
11

## 12 365 **COMPETING INTERESTS**

13  
14 366 None declared  
15

## 16 367 **FUNDING**

17  
18  
19 368 This work was supported by the National Institutes of Health and the FDA Center for  
20  
21 369 Tobacco Products (CTP) grant number P50HL120163.  
22

## 23 370 **Acknowledgements**

24  
25  
26 371 Study design reported in this publication was supported by the AHA Tobacco  
27  
28 372 Regulation and Addiction Center (A-TRAC) and FDA Center for Tobacco Products  
29  
30 373 (CTP). The content is solely the responsibility of the authors and does not necessarily  
31  
32 374 represent the official views of the NIH or the Food and Drug Administration.  
33  
34

## 35 375 **REFERENCES**

- 36  
37  
38 376 1. Rostron B. Smoking-Attributable Mortality by Cause in the United States: Revising the CDC's Data and  
39 377 Estimates. *Nicotine Tob Res* 2013;**15**(1):238-46.  
40 378 2. Morris PB, Ference BA, Jahangir E, et al. Cardiovascular Effects of Exposure to Cigarette Smoke and  
41 379 Electronic Cigarettes: Clinical Perspectives From the Prevention of Cardiovascular Disease  
42 380 Section Leadership Council and Early Career Councils of the American College of Cardiology. *J*  
43 381 *Am Coll Cardiol* 2015;**66**(12):1378-91.  
44 382 3. Haussmann HJ. Use of hazard indices for a theoretical evaluation of cigarette smoke composition.  
45 383 *Chem Res Toxicol* 2012;**25**(4):794-810.  
46 384 4. Ghilarducci DP, Tjeerdema RS. Fate and effects of acrolein. *Rev Environ Contam Toxicol* 1995;**144**:95-  
47 385 146.  
48 386 5. Dong JZ, Moldoveanu SC. Gas chromatography-mass spectrometry of carbonyl compounds in  
49 387 cigarette mainstream smoke after derivatization with 2,4-dinitrophenylhydrazine. *J Chromatogr*  
50 388 *A* 2004;**1027**(1-2):25-35.  
51 389 6. Stepanov I, Jensen J, Hatsukami D, et al. New and traditional smokeless tobacco: comparison of  
52 390 toxicant and carcinogen levels. *Nicotine Tob Res* 2008;**10**(12):1773-82.  
53 391 7. Awe SO, Adeagbo AS, D'Souza SE, et al. Acrolein induces vasodilatation of rodent mesenteric bed via  
54 392 an EDHF-dependent mechanism. *Toxicol Appl Pharmacol* 2006;**217**(3):266-76.  
55  
56

- 393 8. Conklin DJ, Barski OA, Lesgards JF, et al. Acrolein consumption induces systemic dyslipidemia and  
394 lipoprotein modification. *Toxicol Appl Pharmacol* 2010;**243**(1):1-12.
- 395 9. Conklin DJ, Bhatnagar A, Cowley HR, et al. Acrolein generation stimulates hypercontraction in isolated  
396 human blood vessels. *Toxicol Appl Pharmacol* 2006;**217**(3):277-88.
- 397 10. Conklin DJ, Haberzettl P, Lesgards JF, et al. Increased sensitivity of glutathione S-transferase P-null  
398 mice to cyclophosphamide-induced urinary bladder toxicity. *J Pharmacol Exp Ther*  
399 **2009**;**331**(2):456-69.
- 400 11. Conklin DJ, Haberzettl P, Prough RA, et al. Glutathione-S-transferase P protects against endothelial  
401 dysfunction induced by exposure to tobacco smoke. *Am J Physiol Heart Circ Physiol*  
402 **2009**;**296**(5):H1586-97.
- 403 12. Ismahil MA, Hamid T, Haberzettl P, et al. Chronic oral exposure to the aldehyde pollutant acrolein  
404 induces dilated cardiomyopathy. *Am J Physiol Heart Circ Physiol* 2011;**301**(5):H2050-60.
- 405 13. O'Toole TE, Hellmann J, Wheat L, et al. Episodic exposure to fine particulate air pollution decreases  
406 circulating levels of endothelial progenitor cells. *Circ Res* 2010;**107**(2):200-3.
- 407 14. O'Toole TE, Zheng YT, Hellmann J, et al. Acrolein activates matrix metalloproteinases by increasing  
408 reactive oxygen species in macrophages. *Toxicol Appl Pharmacol* 2009;**236**(2):194-201.
- 409 15. Sithu SD, Srivastava S, Siddiqui MA, et al. Exposure to acrolein by inhalation causes platelet  
410 activation. *Toxicol Appl Pharmacol* 2010;**248**(2):100-10.
- 411 16. Srivastava S, Sithu SD, Vladykovskaya E, et al. Oral exposure to acrolein exacerbates atherosclerosis  
412 in apoE-null mice. *Atherosclerosis* 2011;**215**(2):301-8.
- 413 17. Tsakadze NL, Srivastava S, Awe SO, et al. Acrolein-induced vasomotor responses of rat aorta. *Am J*  
414 *Physiol Heart Circ Physiol* 2003;**285**(2):H727-34.
- 415 18. Wang GW, Guo Y, Vondriska TM, et al. Acrolein consumption exacerbates myocardial ischemic injury  
416 and blocks nitric oxide-induced PKCepsilon signaling and cardioprotection. *J Mol Cell Cardiol*  
417 **2008**;**44**(6):1016-22.
- 418 19. Wheat LA, Haberzettl P, Hellmann J, et al. Acrolein inhalation prevents vascular endothelial growth  
419 factor-induced mobilization of Flk-1+/Sca-1+ cells in mice. *Arterioscler Thromb Vasc Biol*  
420 **2011**;**31**(7):1598-606.
- 421 20. WHO Study Group on Tobacco Product Regulation. Report on the scientific basis of tobacco product  
422 regulation: fourth report of a WHO study group. *World Health Organ Tech Rep Ser* 2012(967):1-  
423 83, 1 p following 83.
- 424 21. De Woskin R, Greenberg M, Pepelko W, et al. Toxicological review of acrolein (cas no. 107-02-08) in  
425 support of summary information on the integrated risk information system (Iris). Washington,  
426 DC: US Environmental Protection Agency 2003.
- 427 22. Kosmider L, Sobczak A, Fik M, et al. Carbonyl compounds in electronic cigarette vapors: effects of  
428 nicotine solvent and battery output voltage. *Nicotine Tob Res* 2014;**16**(10):1319-26.
- 429 23. Goniewicz ML, Knysak J, Gawron M, et al. Levels of selected carcinogens and toxicants in vapour  
430 from electronic cigarettes. *Tob Control* 2014;**23**(2):133-9.
- 431 24. Wang P, Chen W, Liao J, et al. A Device-Independent Evaluation of Carbonyl Emissions from Heated  
432 Electronic Cigarette Solvents. *PLoS One* 2017;**12**(1):e0169811.
- 433 25. Hill JM, Zalos G, Halcox JP, et al. Circulating endothelial progenitor cells, vascular function, and  
434 cardiovascular risk. *The New England journal of medicine* 2003;**348**(7):593-600.
- 435 26. Parsons VL, Moriarity C, Jonas K, et al. Design and estimation for the national health interview  
436 survey, 2006-2015. *Vital Health Stat 2* 2014(165):1-53.
- 437 27. Alwis KU, Blount BC, Britt AS, et al. Simultaneous analysis of 28 urinary VOC metabolites using ultra  
438 high performance liquid chromatography coupled with electrospray ionization tandem mass  
439 spectrometry (UPLC-ESI/MSMS). *Analytica chimica acta* 2012;**750**:152-60.

- 1  
2  
3 440 28. Vasa M, Fichtlscherer S, Aicher A, et al. Number and migratory activity of circulating endothelial  
4 441 progenitor cells inversely correlate with risk factors for coronary artery disease. *Circ Res*  
5 442 2001;**89**(1):E1-7.  
6  
7 443 29. Werner N, Nickenig G. Influence of cardiovascular risk factors on endothelial progenitor cells:  
8 444 limitations for therapy? *Arterioscler Thromb Vasc Biol* 2006;**26**(2):257-66.  
9 445 30. DeJarnett N, Yeager R, Conklin DJ, et al. Residential Proximity to Major Roadways Is Associated With  
10 446 Increased Levels of AC133+ Circulating Angiogenic Cells. *Arteriosclerosis, thrombosis, and*  
11 447 *vascular biology* 2015;**35**(11):2468-77.  
12 448 31. Poredos P, Orehek M, Tratnik E. Smoking is associated with dose-related increase of intima-media  
13 449 thickness and endothelial dysfunction. *Angiology* 1999;**50**(3):201-8.  
14 450 32. Heiss C, Amabile N, Lee AC, et al. Brief secondhand smoke exposure depresses endothelial  
15 451 progenitor cells activity and endothelial function: sustained vascular injury and blunted nitric  
16 452 oxide production. *J Am Coll Cardiol* 2008;**51**(18):1760-71.  
17 453 33. Flammer AJ, Anderson T, Celermajer DS, et al. The assessment of endothelial function: from research  
18 454 into clinical practice. *Circulation* 2012;**126**(6):753-67.  
19 455 34. Benjamin EJ, Larson MG, Keyes MJ, et al. Clinical correlates and heritability of flow-mediated dilation  
20 456 in the community: the Framingham Heart Study. *Circulation* 2004;**109**(5):613-9.  
21 457 35. Vita JA. Nitric oxide-dependent vasodilation in human subjects. *Methods Enzymol* 2002;**359**:186-  
22 458 200.  
23 459 36. Mitchell GF, Guo CY, Benjamin EJ, et al. Cross-sectional correlates of increased aortic stiffness in the  
24 460 community: the Framingham Heart Study. *Circulation* 2007;**115**(20):2628-36.  
25 461 37. Benowitz NL, Dains KM, Dempsey D, et al. Racial differences in the relationship between number of  
26 462 cigarettes smoked and nicotine and carcinogen exposure. *Nicotine Tob Res* 2011;**13**(9):772-83.  
27 463 38. Kondo T, Hayashi M, Takeshita K, et al. Smoking cessation rapidly increases circulating progenitor  
28 464 cells in peripheral blood in chronic smokers. *Arterioscler Thromb Vasc Biol* 2004;**24**(8):1442-7.  
29 465 39. Harding SA, Sarma J, Josephs DH, et al. Upregulation of the CD40/CD40 ligand dyad and platelet-  
30 466 monocyte aggregation in cigarette smokers. *Circulation* 2004;**109**(16):1926-9.  
31 467 40. Gordon C, Gudi K, Krause A, et al. Circulating endothelial microparticles as a measure of early lung  
32 468 destruction in cigarette smokers. *Am J Respir Crit Care Med* 2011;**184**(2):224-32.  
33 469 41. Zevin S, Saunders S, Gourlay SG, et al. Cardiovascular effects of carbon monoxide and cigarette  
34 470 smoking. *J Am Coll Cardiol* 2001;**38**(6):1633-8.  
35 471 42. Newby DE, McLeod AL, Uren NG, et al. Impaired coronary tissue plasminogen activator release is  
36 472 associated with coronary atherosclerosis and cigarette smoking: direct link between endothelial  
37 473 dysfunction and atherothrombosis. *Circulation* 2001;**103**(15):1936-41.  
38 474 43. Schmid P, Karanikas G, Kritz H, et al. Passive smoking and platelet thromboxane. *Thromb Res*  
39 475 1996;**81**(4):451-60.  
40 476 44. Schoenborn CA, Gindi RM. Electronic Cigarette Use Among Adults: United States, 2014. *NCHS Data*  
41 477 *Brief* 2015(217):1-8.  
42 478 45. Maher J, Boysun M, Rohde K, et al. Are Latinos really less likely to be smokers? Lessons from Oregon.  
43 479 *Nicotine & Tobacco Research* 2005;**7**(2):283-87.  
44 480 46. Barbeau EM, Krieger N, Soobader M-J. Working Class Matters: Socioeconomic Disadvantage,  
45 481 Race/Ethnicity, Gender, and Smoking in NHIS 2000. *Am J Public Health* 2004;**94**(2):269-78.  
46 482 47. Giskes K, Kunst AE, Benach J, et al. Trends in smoking behaviour between 1985 and 2000 in nine  
47 483 European countries by education. *Journal of Epidemiology and Community Health*  
48 484 2005;**59**(5):395.  
49  
50  
51  
52  
53  
54 485  
55  
56  
57  
58  
59  
60

Figure 1.

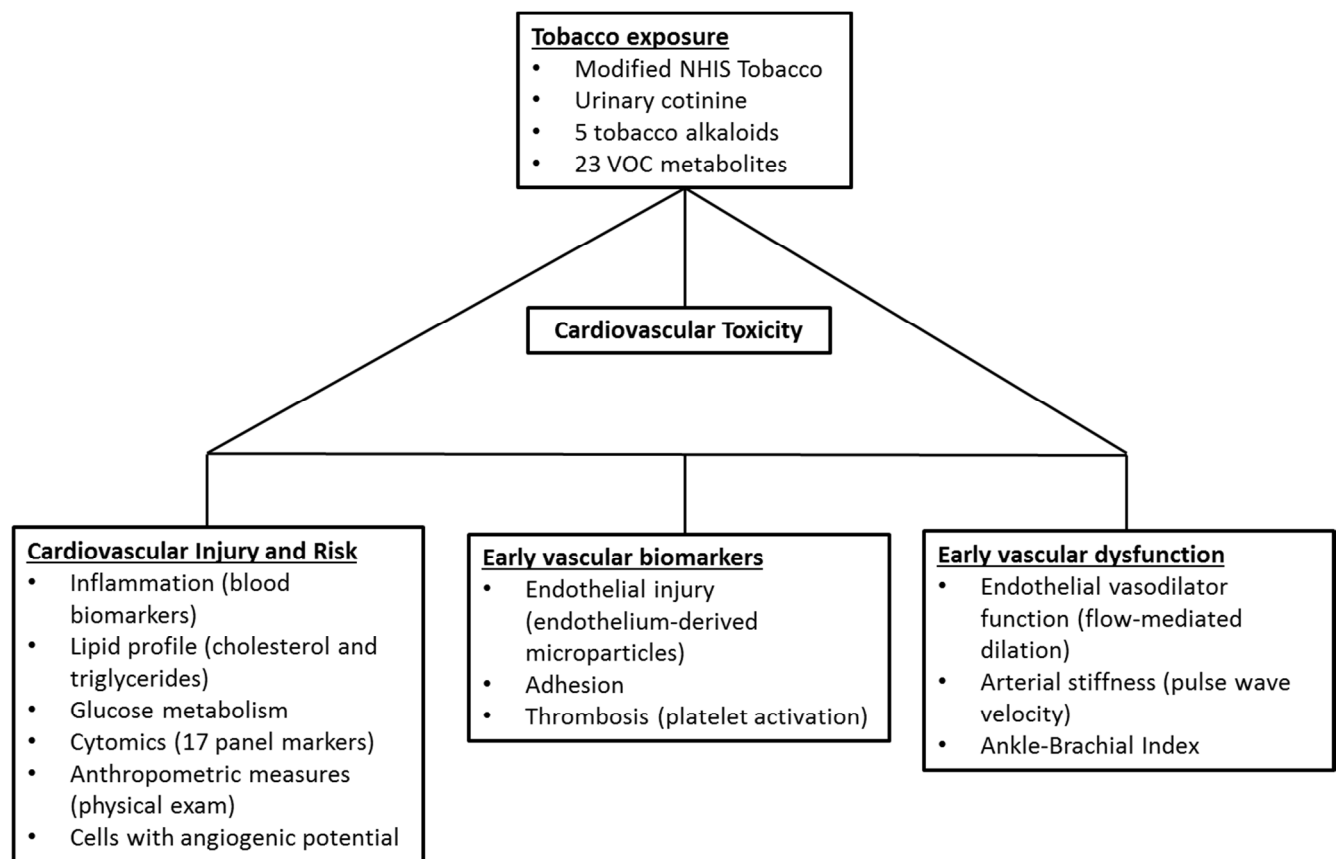



**STROBE 2007 (v4) Statement—Checklist of items that should be included in reports of *cohort studies***

| Section/Topic             | Item # | Recommendation                                                                                                                                                                       | Reported on page #   |
|---------------------------|--------|--------------------------------------------------------------------------------------------------------------------------------------------------------------------------------------|----------------------|
| Title and abstract        | 1      | (a) Indicate the study’s design with a commonly used term in the title or the abstract                                                                                               | 1                    |
|                           |        | (b) Provide in the abstract an informative and balanced summary of what was done and what was found                                                                                  | 2-3                  |
| <b>Introduction</b>       |        |                                                                                                                                                                                      |                      |
| Background/rationale      | 2      | Explain the scientific background and rationale for the investigation being reported                                                                                                 | 3-4                  |
| Objectives                | 3      | State specific objectives, including any prespecified hypotheses                                                                                                                     | 5                    |
| <b>Methods</b>            |        |                                                                                                                                                                                      |                      |
| Study design              | 4      | Present key elements of study design early in the paper                                                                                                                              | 5, 7                 |
| Setting                   | 5      | Describe the setting, locations, and relevant dates, including periods of recruitment, exposure, follow-up, and data collection                                                      | 5, 7                 |
| Participants              | 6      | (a) Give the eligibility criteria, and the sources and methods of selection of participants. Describe methods of follow-up                                                           | 6-7                  |
|                           |        | (b) For matched studies, give matching criteria and number of exposed and unexposed                                                                                                  | N/A                  |
| Variables                 | 7      | Clearly define all outcomes, exposures, predictors, potential confounders, and effect modifiers. Give diagnostic criteria, if applicable                                             | 7-12                 |
| Data sources/ measurement | 8*     | For each variable of interest, give sources of data and details of methods of assessment (measurement). Describe comparability of assessment methods if there is more than one group | 7-12                 |
| Bias                      | 9      | Describe any efforts to address potential sources of bias                                                                                                                            | 7                    |
| Study size                | 10     | Explain how the study size was arrived at                                                                                                                                            | 14-16                |
| Quantitative variables    | 11     | Explain how quantitative variables were handled in the analyses. If applicable, describe which groupings were chosen and why                                                         | 12-14                |
| Statistical methods       | 12     | (a) Describe all statistical methods, including those used to control for confounding                                                                                                | 12-14                |
|                           |        | (b) Describe any methods used to examine subgroups and interactions                                                                                                                  | 13                   |
|                           |        | (c) Explain how missing data were addressed                                                                                                                                          | 13                   |
|                           |        | (d) If applicable, explain how loss to follow-up was addressed                                                                                                                       | N/A (study protocol) |
|                           |        | (e) Describe any sensitivity analyses                                                                                                                                                | 13                   |
| <b>Results</b>            |        |                                                                                                                                                                                      |                      |

|                          |     |                                                                                                                                                                                                              |                      |
|--------------------------|-----|--------------------------------------------------------------------------------------------------------------------------------------------------------------------------------------------------------------|----------------------|
| Participants             | 13* | (a) Report numbers of individuals at each stage of study—eg numbers potentially eligible, examined for eligibility, confirmed eligible, included in the study, completing follow-up, and analysed            | N/A (study protocol) |
|                          |     | (b) Give reasons for non-participation at each stage                                                                                                                                                         | N/A (study protocol) |
|                          |     | (c) Consider use of a flow diagram                                                                                                                                                                           | N/A (study protocol) |
| Descriptive data         | 14* | (a) Give characteristics of study participants (eg demographic, clinical, social) and information on exposures and potential confounders                                                                     | N/A (study protocol) |
|                          |     | (b) Indicate number of participants with missing data for each variable of interest                                                                                                                          | N/A (study protocol) |
|                          |     | (c) Summarise follow-up time (eg, average and total amount)                                                                                                                                                  | N/A (study protocol) |
| Outcome data             | 15* | Report numbers of outcome events or summary measures over time                                                                                                                                               | N/A (study protocol) |
| Main results             | 16  | (a) Give unadjusted estimates and, if applicable, confounder-adjusted estimates and their precision (eg, 95% confidence interval). Make clear which confounders were adjusted for and why they were included | N/A (study protocol) |
|                          |     | (b) Report category boundaries when continuous variables were categorized                                                                                                                                    | N/A (study protocol) |
|                          |     | (c) If relevant, consider translating estimates of relative risk into absolute risk for a meaningful time period                                                                                             | N/A (study protocol) |
| Other analyses           | 17  | Report other analyses done—eg analyses of subgroups and interactions, and sensitivity analyses                                                                                                               | N/A (study protocol) |
| <b>Discussion</b>        |     |                                                                                                                                                                                                              |                      |
| Key results              | 18  | Summarise key results with reference to study objectives                                                                                                                                                     | N/A (study protocol) |
| <b>Limitations</b>       |     |                                                                                                                                                                                                              |                      |
| Interpretation           | 20  | Give a cautious overall interpretation of results considering objectives, limitations, multiplicity of analyses, results from similar studies, and other relevant evidence                                   | 17                   |
| Generalisability         | 21  | Discuss the generalisability (external validity) of the study results                                                                                                                                        |                      |
| <b>Other information</b> |     |                                                                                                                                                                                                              |                      |
| Funding                  | 22  | Give the source of funding and the role of the funders for the present study and, if applicable, for the original study on which the present article is based                                                | 19                   |

\*Give information separately for cases and controls in case-control studies and, if applicable, for exposed and unexposed groups in cohort and cross-sectional studies.

**Note:** An Explanation and Elaboration article discusses each checklist item and gives methodological background and published examples of transparent reporting. The STROBE checklist is best used in conjunction with this article (freely available on the Web sites of PLoS Medicine at <http://www.plosmedicine.org/>, Annals of Internal Medicine at <http://www.annals.org/>, and Epidemiology at <http://www.epidem.com/>). Information on the STROBE Initiative is available at [www.strobe-statement.org](http://www.strobe-statement.org).

# BMJ Open

## Protocol to Assess the Impact of Tobacco-Induced Volatile Organic Compounds on Cardiovascular Risk in a Cross-Sectional Cohort: Cardiovascular Injury Due to Tobacco Study

|                                 |                                                                                                                                                                                                                                                                                                                                                                                                                                                                                                                                                                                                                                                                                                                                                                                                                                                                                                                                                                                                                                                                                                                                                                                                                                                                                                                                                                                                                                            |
|---------------------------------|--------------------------------------------------------------------------------------------------------------------------------------------------------------------------------------------------------------------------------------------------------------------------------------------------------------------------------------------------------------------------------------------------------------------------------------------------------------------------------------------------------------------------------------------------------------------------------------------------------------------------------------------------------------------------------------------------------------------------------------------------------------------------------------------------------------------------------------------------------------------------------------------------------------------------------------------------------------------------------------------------------------------------------------------------------------------------------------------------------------------------------------------------------------------------------------------------------------------------------------------------------------------------------------------------------------------------------------------------------------------------------------------------------------------------------------------|
| Journal:                        | <i>BMJ Open</i>                                                                                                                                                                                                                                                                                                                                                                                                                                                                                                                                                                                                                                                                                                                                                                                                                                                                                                                                                                                                                                                                                                                                                                                                                                                                                                                                                                                                                            |
| Manuscript ID                   | bmjopen-2017-019850.R1                                                                                                                                                                                                                                                                                                                                                                                                                                                                                                                                                                                                                                                                                                                                                                                                                                                                                                                                                                                                                                                                                                                                                                                                                                                                                                                                                                                                                     |
| Article Type:                   | Protocol                                                                                                                                                                                                                                                                                                                                                                                                                                                                                                                                                                                                                                                                                                                                                                                                                                                                                                                                                                                                                                                                                                                                                                                                                                                                                                                                                                                                                                   |
| Date Submitted by the Author:   | 02-Jan-2018                                                                                                                                                                                                                                                                                                                                                                                                                                                                                                                                                                                                                                                                                                                                                                                                                                                                                                                                                                                                                                                                                                                                                                                                                                                                                                                                                                                                                                |
| Complete List of Authors:       | Keith, Rachel; University of Louisville, Medicine; American Heart Association- Tobacco Regulation and Addiction Center<br>Fetterman, Jessica; Boston Medical Center, Vascular Biology Section, Whitaker Cardiovascular Institute; American Heart Association- Tobacco Regulation and Addiction Center<br>Riggs, Daniel; American Heart Association- Tobacco Regulation and Addiction Center; University of Louisville, Medicine<br>O'Toole, Timothy; University of Louisville, Medicine; American Heart Association- Tobacco Regulation and Addiction Center<br>Nystoriak, Jessica; University of Louisville, Medicine; American Heart Association- Tobacco Regulation and Addiction Center<br>Holbrook, Monika; Boston Medical Center, Vascular Biology Section, Whitaker Cardiovascular Institute; American Heart Association- Tobacco Regulation and Addiction Center<br>Lorkiewicz, Pawel; University of Louisville, Medicine; American Heart Association- Tobacco Regulation and Addiction Center<br>Bhatnagar, Aruni; University of Louisville, Medicine; American Heart Association- Tobacco Regulation and Addiction Center<br>DeFilippis, Andrew; University of Louisville, Medicine; American Heart Association- Tobacco Regulation and Addiction Center<br>Hamburg, Naomi ; Boston University, Vascular Biology Section, Whitaker Cardiovascular Institute; American Heart Association- Tobacco Regulation and Addiction Center |
| <b>Primary Subject Heading</b>: | Cardiovascular medicine                                                                                                                                                                                                                                                                                                                                                                                                                                                                                                                                                                                                                                                                                                                                                                                                                                                                                                                                                                                                                                                                                                                                                                                                                                                                                                                                                                                                                    |
| Secondary Subject Heading:      | Public health                                                                                                                                                                                                                                                                                                                                                                                                                                                                                                                                                                                                                                                                                                                                                                                                                                                                                                                                                                                                                                                                                                                                                                                                                                                                                                                                                                                                                              |
| Keywords:                       | smoking, tobacco, electronic cigarette, cardiovascular risk, vascular injury, cigarettes                                                                                                                                                                                                                                                                                                                                                                                                                                                                                                                                                                                                                                                                                                                                                                                                                                                                                                                                                                                                                                                                                                                                                                                                                                                                                                                                                   |
|                                 |                                                                                                                                                                                                                                                                                                                                                                                                                                                                                                                                                                                                                                                                                                                                                                                                                                                                                                                                                                                                                                                                                                                                                                                                                                                                                                                                                                                                                                            |

SCHOLARONE™  
Manuscripts

1  
2  
3 1 **Protocol to Assess the Impact of Tobacco-Induced Volatile Organic Compounds**  
4  
5 2 **on Cardiovascular Risk in a Cross-Sectional Cohort: Cardiovascular Injury Due to**  
6  
7 **Tobacco Study**  
8  
9

10 4 Rachel J. Keith, Jessica L. Fetterman, Daniel W. Riggs, Tim O'Toole, Jessica Nystoriak,  
11  
12 5 Monica Holbrook, Pawel Lorkiewicz, Aruni Bhatnagar, Andrew DeFilippis\*, Naomi M.  
13  
14 6  
15 6 Hamburg\*

16  
17 7 Rachel J. Keith-Division of Cardiovascular Medicine, University of Louisville School of  
18  
19 8 Medicine 580 S. Preston St. Louisville KY, 40202 [rachel.keith@louisville.edu](mailto:rachel.keith@louisville.edu) 502-852-  
20  
21 9 4211

22  
23  
24 10 Jessica L. Fetterman- Vascular Biology Section, Whitaker Cardiovascular Institute,  
25  
26 11 Boston University School of Medicine Evans Building, Boston, MA USA

27  
28 12 Jasmit Shah- University of Louisville School of Medicine Louisville, KY USA

29  
30  
31 13 Timothy O-Toole- Division of Cardiovascular Medicine, University of Louisville School of  
32  
33 14 Medicine Louisville, KY USA

34  
35 15 Jessica L. Nystoriak- Division of Cardiovascular Medicine, University of Louisville  
36  
37 16 School of Medicine Louisville, KY USA

38  
39  
40 17 Monika Holbrook- Vascular Biology Section, Whitaker Cardiovascular Institute, Boston  
41  
42 18 University School of Medicine Boston, MA USA

43  
44  
45 19 Pawel Lorkiewicz- Division of Cardiovascular Medicine, University of Louisville School  
46  
47 20 of Medicine Louisville, KY USA

48  
49 21 Aruni Bhatnagar- Division of Cardiovascular Medicine, University of Louisville School of  
50  
51 22 Medicine Louisville, KY USA

23 Andrew P. DeFilippis- Division of Cardiovascular Medicine, University of Louisville  
24 School of Medicine Louisville, KY USA (co-senior author)

25 Naomi M. Hamburg- Vascular Biology Section, Whitaker Cardiovascular Institute,  
26 Boston University School of Medicine Boston, MA USA (co-senior author)

28 **Word Count: 2581**

## 30 **ABSTRACT**

31 **Introduction:** Tobacco use leads to increased mortality, the majority of which is  
32 attributed to cardiovascular disease. Despite this knowledge, the early cardiovascular  
33 impact of tobacco product use is not well understood. Tobacco use increases exposure  
34 to harmful and potentially harmful constituents including volatile organic compounds  
35 (VOCs) such as acrolein and crotonaldehyde, which may contribute to cardiovascular  
36 risk. The link between exposure patterns, risk profiles and demographic distribution of  
37 tobacco product users, particularly users of new and emerging products, are not well  
38 known. Therefore, we designed the Cardiovascular Injury due to Tobacco Use (CITU)  
39 study to assess population characteristics, demographic features, exposure patterns  
40 and cardiovascular risk in relation to tobacco.

41 **Methods and analysis:** We present the design and methodology of the CITU study a  
42 cross-section observational tobacco study conducted in Boston MA and Louisville KY  
43 starting in 2014. Healthy participants 21 to 45 years of age who use tobacco products,  
44 including ENDS, or who never used tobacco are being recruited. The study aims to  
45 recruit an evenly split cohort of African Americans and Caucasians that is sex balanced

1  
2  
3 46 for evaluation of self-reported tobacco exposure, VOC exposure and tobacco-induced  
4  
5 47 injury profiling. Detailed information about participant's demographics, health status and  
6  
7 48 lifestyle is also collected.

9  
10 49 **Ethics and dissemination:** The study protocol was approved institutional review  
11  
12 50 boards at both participating universities. All study protocols will protect participant  
13  
14 51 confidentiality. Results from the study will be disseminated via peer-reviewed journals  
15  
16 52 and presented at scientific conferences.  
17  
18  
19 53

## 21 54 **Strengths and limitations**

- 24 55 • Young age to allow for evaluation of early stage disease (e.g. inflammation,  
25  
26 56 endothelial function) as opposed to end stage clinical consequence (e.g.  
27  
28 57 myocardial infarction)
- 31 58 • Diverse tobacco product use allows for assessment of a wide range of tobacco-  
32  
33 59 induced VOC exposure
- 35 60 • All study visits are in English introducing selection bias
- 38 61 • Data will inform regulatory agencies on the cardiovascular health effects of  
39  
40 62 multiple tobacco products and the contribution of HPHCs  
41  
42  
43 63

44  
45 64 **Keywords:** Tobacco, smoking, electronic cigarette, vascular injury, cardiovascular risk,  
46  
47 65 cigarettes.  
48  
49 66

## 51 67 **INTRODUCTION**

52  
53  
54  
55  
56  
57  
58  
59  
60

1  
2  
3 68 Tobacco product use and smoking are the leading causes of preventable deaths  
4  
5 69 throughout the world. Of those deaths, one-third are attributed to cardiovascular disease  
6  
7 70 (CVD)<sup>1</sup>. The cardiovascular (CV) effects of tobacco exposure can include  
8  
9  
10 71 atherogenesis, vascular injury, thrombosis, arrhythmias and inflammation<sup>2</sup> and may be  
11  
12 72 attributable to the many different harmful and potentially harmful constituents (HPHCs)  
13  
14 73 present in tobacco products.

15  
16  
17 74 The HPHCs found in tobacco products include volatile organic compounds  
18  
19 75 (VOCs) of which reactive aldehydes, such as acrolein and crotonaldehyde, are likely the  
20  
21 76 most significant contributors to CV toxicity<sup>3</sup>. High levels of aldehydes are present in  
22  
23 77 cigarette smoke<sup>4,5</sup> as well as smokeless tobacco (ST)<sup>6</sup>. Risk assessments, using the  
24  
25 78 prevalence of each individual chemical weighed by its potency, suggest that the non-  
26  
27 79 cancer risk of smoking is dominated by acrolein, which contributes 40-100 times more  
28  
29 80 to risk than any other chemical present in cigarette smoke<sup>3</sup>.

30  
31  
32  
33 81 Although HPHCs, including VOC reactive aldehydes, have been suspected to be  
34  
35 82 major contributors to the toxicity of cigarette smoke for over 4 decades, their  
36  
37 83 contribution to CV injury and early CVD risk has not been rigorously evaluated.  
38  
39 84 Experimental studies in animal models suggest that because of low aldehyde-  
40  
41 85 metabolizing capacity, CV tissues are highly sensitive to aldehydes and exposure to low  
42  
43 86 levels of aldehydes can induce CV injury and accelerate CVD<sup>7-18</sup>. The WHO Study  
44  
45 87 Group on Tobacco Product Regulation (TobReg) has marked acrolein, a VOC, along  
46  
47 88 with 8 other cigarette constituents for monitoring and regulation<sup>19</sup> and the U.S.  
48  
49 89 Environmental Protection Agency lists Acrolein as one of most hazardous air  
50  
51 90 pollutants<sup>20</sup>. Nevertheless, the contribution of tobacco induced VOCs, including acrolein

1  
2  
3 91 or other aldehydes, toward CV toxicity in humans has not been fully assessed. Greater  
4  
5 92 understanding of how aldehydes affect cardiovascular health and disease will provide  
6  
7 93 new avenues for evaluating the toxicity of cigarette smoke and for assessing the  
8  
9 94 injurious potential of new and emerging tobacco products, such as ENDS, which may  
10  
11 95 also contain VOCs including acrolein<sup>21-23</sup>.  
12  
13

14 96 The latency period between tobacco exposure and the development of major  
15  
16 97 clinical adverse health effects is long, therefore biomarkers that provide information over  
17  
18 98 a shorter period allow for the identification of harm decades before clinical outcome data  
19  
20 99 is available. Thus, in this paper we present the design and methodology of the  
21  
22 100 Cardiovascular Injury due To Tobacco Use (CITU) study which will evaluate the  
23  
24 101 association of the urinary metabolites of 18 parent VOCs from tobacco exposure with a  
25  
26 102 comprehensive set of CV biomarkers representative of early disease and predictive of  
27  
28 103 future CV events.<sup>24</sup>  
29  
30  
31  
32

## 33 104 **METHODS AND DESIGN**

### 34 35 105 **Overall design**

36  
37 106 The CITU study is an investigator-initiated cross-sectional observational study of  
38  
39 107 around 500 healthy participants 21 to 45 years of age who are never or current tobacco  
40  
41 108 product users in two urban areas at Boston University (BU) and University of Louisville  
42  
43 109 (UofL) (Boston, MA and Louisville, KY) designed to evaluate CV toxicity due to tobacco  
44  
45 110 product use, with correlations to VOCs found in the tobacco products (**Figure 1**).  
46  
47  
48

49 111

50  
51 112

### 52 53 113 **Participant Eligibility Criteria**



114 The goal of the study is to examine the impact of tobacco products on healthy  
 115 young adults who could be classified as a current tobacco product users (Defined in  
 116 table 1), or never-users (does not have lifetime use of any tobacco product).  
 117 Participants were self-reported to be healthy therefore we excluded participants if they  
 118 had: 1) diagnosis of clinical cardiovascular disease including but not limited to known  
 119 heart attack, peripheral artery disease, heart failure or stroke; 2) diagnosis of diabetes  
 120 (HbA1c >7.0 or treatment for diabetes), hypertension (systolic blood pressure >140 mm  
 121 Hg or diastolic blood pressure >90 mm Hg), hypothyroidism or hyperthyroidism,  
 122 inflammatory conditions such as lupus or inflammatory bowel disease, HIV/AIDS,  
 123 hepatitis, liver disease, anemia, cancer of any type or another medical condition that  
 124 might compromise the successful completion of the study; 2) recipients of organ  
 125 transplant or renal replacement therapy; 3) individuals that are taking the following  
 126 medications: immunosuppressant agents estrogen, testosterone, anti TNF agents,  
 127 certain biologics, Procrit, statins, beta-blockers or other cardiovascular medicine; 4)  
 128 individuals using nutraceuticals or anabolic steroids beyond the recommended daily  
 129 allowance; 5) body weight less than 100 pounds; 6) pregnant women; 7) prisoners and  
 130 other vulnerable populations; and 8) active illness or infection. Participants are  
 131 rescheduled or considered screen-failures and excluded from the study if symptomatic  
 132 of an acute illness, i.e. viral upper respiratory infection, on study date.

133 **Table 1. Tobacco product use classifications**

| Classification         | Qualification                                                       |
|------------------------|---------------------------------------------------------------------|
| Never                  | Does not meet lifetime limits for any tobacco use (see below)       |
| Smoker                 | >100 lifetime cigarettes and current use for the past year          |
| Smokeless Tobacco User | >20 lifetime dips or chews and current use for the past year        |
| Cigar/Cigarillo User   | >20 lifetime cigars or cigarillos and current use for the past year |
| Pipe User              | >20 lifetime pipefuls and current use for the past year             |

|             |                                                                |
|-------------|----------------------------------------------------------------|
| ENDS User   | >20 lifetime vape sessions and current use for the past year   |
| Hookah User | >20 lifetime hookah sessions and current use for the past year |

134 *Study participants are screened prior to enrollment for current and past tobacco product*  
 135 *use. Participants are characterized and assigned a use group based on self-reported*  
 136 *patterns collected during the study visits.*

## 137 **Overall Study Procedure**

138 Study participants fast for 8 h from food and 6 h from tobacco prior to the visit. All  
 139 study visits occur before 11AM to limit effects due to circadian changes. All vascular  
 140 function studies are completed after 10 min of supine positioning. All vascular studies  
 141 are sent to the BU central lab for analysis. BU biologic samples have minimal  
 142 processing and are shipped overnight to the UofL central laboratory at the completion of  
 143 each study visit. Samples obtained at UofL are processed to a similar stage, then held  
 144 overnight prior to analysis for standardization of time to measurement for all samples.

145 Study visits take approximately 90 minutes to complete and include a structured  
 146 interview on demographics, socioeconomics, lifestyle, health, family history of heart  
 147 disease, allergies, and tobacco use. (**Figure 2**) Participants were compensated  
 148 appropriately for their time. All surveys are collected and kept in Research Electronic  
 149 Data Capture (REDCap), a secure web application for building and managing online  
 150 surveys and databases.

## 151 **Exposure Variables**

### 152 Tobacco Product Use & Particulate Matter Exposure

153 Comprehensive tobacco product exposure is assessed using a modified version  
 154 of the National Health Interview survey on tobacco use<sup>25</sup>. The survey is modified to  
 155 include detailed information on electronic nicotine devices (ENDs) and other new or

156 emerging tobacco products. Residential addresses are collected for assessment of  
 157 ambient airborne particulate matter (PM<sub>2.5</sub>) exposure and future correction of overall  
 158 exposure. PM<sub>2.5</sub> data from the day of the study visit, and 3 and 5 days prior to the study  
 159 is collected from publicly available data associated with EPA monitoring stations. Other  
 160 exposure variables, including occupation, are collected through interview.

#### 161 VOC Measurements

162 Standard clean catch urine specimens are obtained from participants. We have  
 163 developed a robust Core Lab that utilizes mass spectrometry procedures adopted from  
 164 the Centers for Disease Control and Prevention (CDC) protocols, to quantify 23 urinary  
 165 metabolites of tobacco smoking related toxins (aldehydes and other VOCs), including  
 166 acrolein<sup>26</sup> (**Table 2**). The concentration values of analytes are then normalized to  
 167 urinary creatinine levels measured using Infinity Creatinine Reagent (Thermo Fisher  
 168 Scientific, MA) on a COBAS MIRA-plus analyzer (Roche, NJ).

#### 169 **Table 2 Exposure Variables (Please see end of article)**

| <i>Parent compound</i> | <i>VOC metabolite</i>                              | <i>Common abbr.</i> |
|------------------------|----------------------------------------------------|---------------------|
| Acetaldehyde           | Acetic acid/Acetate                                | ACETATE             |
| Acrolein               | N-Acetyl-S-(2-carboxyethyl)-L-cysteine             | CEMA                |
|                        | N-Acetyl-S-(3-hydroxypropyl)-L-cysteine            | 3HPMA               |
| Acrylamide             | N-Acetyl-S-(2-carbamoylethyl)-L-cysteine           | AAMA                |
|                        | N-Acetyl-S-(2-carbamoyl-2-hydroxyethyl)-L-cysteine | GAMA                |
| Acrylonitrile          | N-Acetyl-S-(2-cyanoethyl)-L-cysteine               | CYMA                |

|                                                  |                                                    |         |
|--------------------------------------------------|----------------------------------------------------|---------|
| Acrylonitrile, vinyl chloride,<br>ethylene oxide | N-Acetyl-S-(2-hydroxyethyl)-L-cysteine             | HEMA    |
| Anabasine                                        | Anabasine (free)                                   | ANB     |
| Anatabine                                        | Anatabine (free)                                   | ANTB    |
| Benzene                                          | N-Acetyl-S-(phenyl)-L-cysteine                     | PMA     |
|                                                  | trans, trans-Muconic acid                          | MU      |
| 1-Bromopropane                                   | N-Acetyl-S-(n-propyl)-L-cysteine                   | BPMA    |
| 1,3-Butadiene                                    | N-Acetyl-S-(3,4-dihydroxybutyl)-L-cysteine         | DHBMA   |
|                                                  | N-Acetyl-S-(1-hydroxymethyl-2-propenyl)-L-cysteine | MHBMA1  |
|                                                  | N-Acetyl-S-(2-hydroxy-3-butenyl)-L-cysteine        | MHBMA2  |
|                                                  | N-Acetyl-S-(4-hydroxy-2-buten-1-yl)-L-cysteine     | MHBMA3  |
| Carbon-disulfide                                 | 2-Thioxothiazolidine-4-carboxylic acid             | TTCA    |
| Crotonaldehyde                                   | N-Acetyl-S-(3-hydroxypropyl-1-methyl)-L-cysteine   | HPMMA   |
| Cyanide                                          | 2-Aminothiazoline-4-carboxylic acid                | ATCA    |
| N,N-Dimethylformamide                            | N-Acetyl-S-(N-methylcarbamoyl)-L-cysteine          | AMCC    |
| Ethylbenzene, styrene                            | Phenylglyoxylic acid                               | PGA     |
| Formaldehyde                                     | Formate                                            | FORMATE |
| Nicotine                                         | Nicotine                                           | NIC     |
|                                                  | Cotinine                                           | COT     |
|                                                  | 3-Hydroxycotinine                                  | 3HC     |
| Propylene oxide                                  | N-Acetyl-S-(2-hydroxypropyl)-L-cysteine            | 2HPMA   |
| Styrene                                          | N-Acetyl-S-(1-phenyl-2-hydroxyethyl)-L-cysteine +  | PHEMA   |

|                     |                                                                                                                                            |            |
|---------------------|--------------------------------------------------------------------------------------------------------------------------------------------|------------|
|                     | N-Acetyl-S-(2-phenyl-2-hydroxyethyl)-L-cysteine                                                                                            |            |
|                     | Mandelic acid                                                                                                                              | MA         |
| Tetrachloroethylene | N-Acetyl-S-(trichlorovinyl)-L-cysteine                                                                                                     | TCVMA      |
| Toluene             | N-Acetyl-S-(benzyl)-L-cysteine                                                                                                             | BMA        |
| Trichloroethylene   | N-Acetyl-S-(1,2-dichlorovinyl)-L-cysteine                                                                                                  | 1,2DCVMA   |
|                     | N-Acetyl-S-(2,2-dichlorovinyl)-L-cysteine                                                                                                  | 2,2DCVMA   |
| Xylene              | N-Acetyl-S-(2,4-dimethylphenyl)-L-cysteine +<br>N-Acetyl-S-(2,5-dimethylphenyl)-L-cysteine +<br>N-Acetyl-S-(3,4-dimethylphenyl)-L-cysteine | DPMA       |
|                     | 2-Methylhippuric acid                                                                                                                      | 2MHA       |
|                     | 3-Methylhippuric acid + 4-Methylhippuric acid                                                                                              | 3MHA+ 4MHA |

170

171 *Urine is analyzed for 23 metabolites of 18 parent VOCs and tobacco alkaloids by UPLC-*  
 172 *MS/MS. Analytes are listed as parent, metabolite and their common abbreviation.*

173

### 174 **Circulating Markers of Cardiovascular Injury**

175 To assess tobacco product-induced cardiovascular toxicity, we examine  
 176 endothelial function, inflammatory mediators, biomarkers, and thrombosis. CV risk is  
 177 defined through measurements of circulating angiogenic cells, lipid profile, and glucose  
 178 metabolism<sup>24 27 28</sup>. Plasma (BD367863 and BD366415) and serum (BD367814)  
 179 samples are obtained from all participants for laboratory testing and long term  
 180 biobanking. Whole blood (BD366415) is obtained for flow cytometry on fresh samples at  
 181 UofL pathology core. BU biologic samples have minimal processing and are shipped

1  
2  
3 182 overnight to the UofL central laboratory at the completion of each study visit. Samples  
4  
5 183 obtained at UofL are processed to a similar stage, then held overnight prior to analysis  
6  
7 184 to standardize the time to measurement for all samples. The UofL central laboratory, as  
8  
9  
10 185 previously reported, will complete fasting and biomarker measurements (**Table 3**), with  
11  
12 186 the exception of cytomics<sup>12 29</sup>. For cytomic measurements, mononuclear cells are  
13  
14 187 labeled with the peripheral blood phenotyping panel kit (Fluidigm). Samples are shipped  
15  
16  
17 188 at 4 degree C to Core Lab facilities at the University of Rochester for Mass cytometric  
18  
19 189 analysis.  
20  
21  
22  
23  
24  
25  
26  
27  
28  
29  
30  
31  
32  
33  
34  
35  
36  
37  
38  
39  
40  
41  
42  
43  
44  
45  
46  
47  
48  
49  
50  
51  
52  
53  
54  
55  
56  
57  
58  
59  
60

190 **Table 3 Blood analysis****Fasting Measurements**

LDL cholesterol, HDL cholesterol, total cholesterol, triglycerides, glucose, uric acid, SAA and fibrinogen

**Biomarkers**

CAC (1-15)<sup>1</sup>, Platelet-monocyte aggregates, MP (1-5)<sup>1</sup>, PF4, t-PA, TxA2, Factor VII, IL-6, CRP, D-dimer, PAI-1, s-ICAM-1, s-VCAM, s-thrombomodulin, s-TNFR1, MMP-2, MMP-3, MMP-9, cytomics, endothelin, E-selectin and P-selectin

1: Fifteen different CAP subpopulations and 5 subtypes of microparticles were measured by flow cytometry.

191 *All participants who complete the study visit will have blood samples taken and*  
 192 *processed. Flow cytometric analysis is completed on fresh samples. All other analysis*  
 193 *will be completed on biobanked samples in batches LDL= low density lipoprotein. HDL=*  
 194 *high density lipoprotein. SAA= serum amyloid A. CAC= circulating angiogenic cells.*  
 195 *MP= microparticles. PF4= Platelet factor 4. t-PA= tissue plasminogen activator.*  
 196 *TxA2=Thromboxane A. IL-6= Interleukin 6. CRP= C-reactive protein. PAI=-*  
 197 *Plasminogen activator. s- ICAM- soluble intercellular adhesion protein inhibitor. s-*  
 198 *VCAM= soluble vascular adhesion protein. TNFR1= Tumor necrosis factor receptor 1.*  
 199 *MMP- Matrix metalloproteinase.*

**200 Non-Invasive Vascular Function Testing**

201 Smoking, is associated with endothelial damage and vascular dysfunction<sup>30 31</sup>.  
 202 Endothelial cells are exposed to circulating toxins and measures of endothelial function  
 203 are reflective of cardiovascular injury<sup>32</sup>. Thus, we examine the non-invasive endothelial  
 204 vasodilator function using flow-mediated vasodilation<sup>33 34</sup>, arterial stiffness with carotid-  
 205 femoral and carotid-radial pulse wave velocity<sup>35</sup>, and peripheral vascular function with  
 206 ankle brachial index. Flow mediated dilation was assessed with a 7.5MHZ ultrasound  
 207 probe is used to image the brachial artery while a 10cm blood pressure cuff is attached

1  
2  
3 208 to the lower arm and a 3 lead ECG is attached to the patient. After baseline images and  
4  
5 209 10 cycles of Doppler images are captured using NIHEM R-wave triggered image  
6  
7  
8 210 capturing software, the blood pressure cuff is inflated to 200mmHg or 50mmHg higher  
9  
10 211 than the systolic pressure. After the 5 minute occlusion, the cuff is released and the  
11  
12 212 NIHEM software records two minutes of imaging. Images were analyzed by a single  
13  
14 213 blinded analyzer using MIA vascular Research Tolls Brachial Analyzer for Research,  
15  
16  
17 214 version 6.8.5. All vascular imagers where trained at BU who have a previously reported  
18  
19 215 reproducibility with intra- and inter-observer correlation coefficients of 0.98 and 0.99 for  
20  
21 216 brachial diameter and 0.78 and 0.92 for FMD.<sup>36</sup> Similar equipment and software is used  
22  
23  
24 217 at both sites. All vascular studies are sent to the BU central lab for analysis.

### 25 26 218 **Anthropometric measures**

27  
28 219 Anthropometric measures included height, weight, waist and hip circumference  
29  
30  
31 220 and body fat. All anthropometric measures are completed twice and the average  
32  
33 221 recorded. Standing height measurements are completed on a fixed stadiometer. Weight  
34  
35 222 measurements are completed on a digital scale to the nearest tenth of a pound. Waist  
36  
37  
38 223 circumference is measured at the level of the umbilicus to the nearest tenth of a  
39  
40 224 centimeter. Hip circumference is measured at the maximal protrusion of the gluteal  
41  
42 225 muscle to the nearest tenth of a centimeter. Body fat percentage is calculated by the  
43  
44 226 bioelectrical impedance measured with the Omron fat loss monitor (HBF-306C).

### 45 46 47 227 **DATA ANALYSIS**

48  
49 228 We expect that from this study we will be able to identify specific biomarkers of  
50  
51 229 cardiovascular injury due to tobacco use and the relationship of these biomarkers to  
52  
53  
54 230 specific measures of tobacco exposure. For instance, we will identify which biomarkers



1  
2  
3 231 are affected by tobacco use, and which ones are most sensitive; including their dose-  
4  
5 232 dependence. Additionally we will examine the extent to which biomarkers are  
6  
7  
8 233 associated with exposure to nicotine versus exposure to HPHC of tobacco like  
9  
10 234 aldehydes.

11  
12 235 All statistical analysis will be performed using SAS version 9.4 software (SAS  
13  
14 236 Institute, Inc., Cary, North Carolina), and a two-sided p-value of <0.05 will be considered  
15  
16 237 significant for any statistical test. Demographics and other baseline characteristics will  
17  
18 238 be summarized according to product group. The primary outcomes will be analyzed  
19  
20 239 using multiple regression techniques. Appropriate Interaction variables will be tested for  
21  
22 240 in the regression models and subgroup analyses will be conducted according to the  
23  
24 241 following factors: significant interactions, sex, age, race, tobacco product group.  
25  
26 242 Multiple imputation method will be used for missing data where appropriate. Sensitivity  
27  
28 243 analysis using different analytic approaches, such as generalized linear models, as well  
29  
30 244 as considering different covariate adjustments, will be used to build concordant results.  
31  
32  
33  
34

35 245 The dose-dependence of the changes in biomarkers will be determined by  
36  
37 246 analyzing the data obtained from individuals that are exposed to different doses of a  
38  
39 247 single product (e.g. smoking 0, <15, 15-20 and >20 cigarettes per day) and by  
40  
41 248 comparing between tobacco products that have different doses of HPHC constituents.  
42  
43 249 In the US the average cigarettes per day is between 15-20<sup>37</sup> and therefore this dose  
44  
45 250 range distribution is reflective of general population exposure. Comparisons of the  
46  
47 251 effects of novel tobacco products and smoking will be informative of the relative toxicity  
48  
49 252 of the two products.  
50  
51  
52  
53  
54  
55  
56  
57  
58  
59  
60

1  
2  
3 253 We believe that the methods employed in the current project are exquisitely  
4  
5 254 sensitive and responsive to even low dose insults such as ambient air pollution <sup>12</sup>  
6  
7  
8 255 allowing us to quantify tobacco product-induced changes with high precision. Moreover,  
9  
10 256 levels of acrolein exposure vary between different individuals due to difference in puffing  
11  
12 257 intensity and the time a cigarette is left smoldering. Thus, direct measurements of  
13  
14 258 acrolein metabolites afford better estimates of acrolein exposure than machine yields.  
15  
16  
17 259 We expect to obtain wide variations in acrolein/crotonaldehyde exposure which will  
18  
19 260 enable us to construct a dose-response relationship and identify which injury  
20  
21 261 biomarkers are associated with aldehyde exposure and whether high levels of exposure  
22  
23  
24 262 are associated with high levels of injury, despite similar nicotine delivery.  
25

### 26 263 **Sample size**

27  
28 264 The sample size is justified in terms of the primary dependent measure, FMD,  
29  
30  
31 265 given the potential importance of this variable as a direct measure of the impact of  
32  
33 266 tobacco exposure. The main comparisons are between non-tobacco users and tobacco  
34  
35 267 users. Due to one control group, we will conservatively adjust our  $\alpha$  (significance level)  
36  
37  
38 268 using a Bonferroni correction, and we will set  $\alpha=0.01$ . Based on preliminary data for  
39  
40 269 FMD, we have observed mean  $\pm$  SD in smoker and nonsmoker groups to be  $4.0 \pm 1.6$   
41  
42 270 and  $6.8 \pm 1.0$ , respectively. We consider at least 25% (mean FMD=3.0 from 4.0)  
43  
44  
45 271 reduction from smokers to non-smokers is meaningful. Using a two sample, one-sided t  
46  
47 272 test with an  $\alpha$  of 0.01 and 80% power ( $1-\beta$ ), assuming a common SD of 1.3, we will  
48  
49 273 need 34 evaluable subjects in each group. We will recruit a total of 120 tobacco using  
50  
51 274 participants per site. This over sampling will allow us to look at multiple endpoints and  
52  
53  
54 275 for associations with VOCs.  
55  
56  
57  
58  
59  
60

## 276 ETHICS AND DISSEMINATION

277 The CITU study was approved at each institution by their institutional review  
278 board (BU #H-32613 and UofL #13.0590) and all participants provide written consent.  
279 No study related procedures will be completed until after participant consent.

280 Participants for the CITU study are being recruited in both Boston, MA and  
281 Louisville KY. The two populations show significant differences, therefore recruitment at  
282 two sites will ensure a range more reflective of the general population. Although overall  
283 racial and ethnic demographics for both cities show a clear majority of Caucasians  
284 (70%) and despite smokers typically male, we strive to, and currently are successful in,  
285 recruiting a population that was gender balanced and almost evenly split between  
286 Caucasian and African Americans. Despite this balanced recruitment, e-cigarette users  
287 have been reported as predominantly Caucasian and male<sup>38</sup>, and thus far our  
288 recruitment mirrors these demographics. We expect very few Hispanic/Latino's to  
289 participate, due to data suggesting tobacco use, including ENDS, tends to be lower  
290 among Hispanic's/Latino's<sup>38 39</sup>. Thus we have also opted to only recruit English  
291 speakers. We have carefully develop our recruitment strategy and exclusion criteria to  
292 protect vulnerable populations, which is important since many report a lower  
293 socioeconomic status and educational level in smokers in addition to higher rates of  
294 reported alcohol and drug use<sup>40 41</sup>.

295 Our study is an observational study where participants have already assumed  
296 the risk of using tobacco. Study procedures pose minimal risk. Given the known harms  
297 associated with smoking, we will provide information on tobacco treatment when

1  
2  
3 298 requested by the participant. Participant information is de-identified for analysis and  
4  
5 299 reported in aggregate to protect privacy.  
6

7  
8 300 Completion of these studies will enable a greater understanding of the biological  
9  
10 301 responses to use of a variety of tobacco products. Specifically, they will help to identify  
11  
12 302 the constituents of these products; and how a panel of exposure and CV injury  
13  
14 303 biomarkers are associated with these different constituents. This data will be available  
15  
16 304 to the FDA and could help guide new policy measures to reduce or eliminate the  
17  
18 305 harmful components of tobacco smoke and other nicotine products. The study is  
19  
20 306 dedicated to the rapid dissemination of their rigorously characterized and well-controlled  
21  
22 307 research findings to the public in the form of peer-reviewed publications. Subsequent to  
23  
24 308 the initial full-length manuscript publications of the resources generated with funding  
25  
26 309 from this program, the study will make them available to interested and qualified  
27  
28 310 investigators upon written request. The study will provide relevant protocols of published  
29  
30 311 data, upon request (presuming prior publication by the Center members). Participants  
31  
32 312 will be provided a summary of the results as they become available. Finally press  
33  
34 313 releases of relevant findings will inform the general population.  
35  
36  
37  
38  
39

40 314

#### 41 42 315 **LIST OF ABBREVIATIONS**

43  
44 316 ABI- Ankle Brachial Index

45  
46 317 CAC= circulating angiogenic cells

47  
48 318 CRP= C-reactive protein

49  
50 319 CVD- Cardiovascular disease

51  
52 320 ENDS- Electronic nicotine Device (i.e. e-cigarette)  
53  
54  
55  
56

- 1  
2  
3 321 FACS- Fluorescence-activated cell sorting  
4  
5 322 FMD- Flow mediated dilation  
6  
7 323 HDL= high density lipoprotein  
8  
9 324 IL-6= Interleukin 6  
10  
11 325 MMP- Matrix metalloproteinase  
12  
13 326 MP= micoparticles  
14  
15 327 PAI=- Plasminogen activator  
16  
17 328 PF4= Platelet factor 4  
18  
19 329 PWV- Pulse wave velocity  
20  
21 330 SAA= serum amyloid A  
22  
23 331 s-ICAM- soluble intercellular adhesion protein inhibitor  
24  
25 332 s-VCAM= soluble vascular adhesion protein  
26  
27 333 TNFR1= Tumor necrosis factor receptor 1  
28  
29 334 t-PA= tissue plasminogen activator  
30  
31 335 TxA2=Thromboxane A  
32  
33 336 VOC- Volatile organic compound  
34  
35 337 W:H- ratio: Waist to hip ratio  
36  
37  
38  
39  
40  
41  
42  
43

#### 44 339 **AUTHORS CONTRIBUTIONS**

46 340 Rachel Keith- Study design, study recruitment, study visits, statistical analysis and  
47  
48 341 manuscript preparation. Jessica Fetterman- study recruitment, study visits, manuscript  
49  
50 342 preparation and editing. Dan Riggs- statistical analysis, manuscript preparation and  
51  
52 343 editing. Tim O'Toole- Biomarker measurements, manuscript preparation and editing.  
53  
54  
55  
56  
57  
58  
59  
60

1  
2  
3 344 Jessica Nystoriak- study recruitment and study visits. Monica Holbrook- study  
4  
5 345 recruitment and study visits. Pawel Lorkiewicz- VOC measurements and manuscript  
6  
7 346 preparation. Aruni Bhatnagar- Study design, study funding and manuscript editing.  
8  
9  
10 347 Andrew DeFilippis- Human subject assessment planning, manuscript preparation and  
11  
12 348 editing. Naomi M. Hamburg- Study design, study funding, vascular core, manuscript  
13  
14 349 preparation and editing.

## 16 350 **COMPETING INTERESTS**

17  
18  
19 351 None declared

## 20 352 **FUNDING**

21  
22  
23 353 This work was supported by the National Institutes of Health and the FDA Center for  
24  
25 354 Tobacco Products (CTP) grant number P50HL120163.

## 26 355 **Acknowledgements**

27  
28 356 Study design reported in this publication was supported by the AHA Tobacco  
29  
30 357 Regulation and Addiction Center (A-TRAC) and FDA Center for Tobacco Products  
31  
32 358 (CTP). The content is solely the responsibility of the authors and does not necessarily  
33  
34 359 represent the official views of the NIH or the Food and Drug Administration.

## 35 360 **REFERENCES**

- 36  
37  
38 361 1. Rostron B. Smoking-Attributable Mortality by Cause in the United States: Revising the CDC's Data and  
39 362 Estimates. *Nicotine Tob Res* 2013;15(1):238-46. doi: 10.1093/ntr/nts120  
40 363 2. Morris PB, Ference BA, Jahangir E, et al. Cardiovascular Effects of Exposure to Cigarette Smoke and  
41 364 Electronic Cigarettes: Clinical Perspectives From the Prevention of Cardiovascular Disease  
42 365 Section Leadership Council and Early Career Councils of the American College of Cardiology. *J*  
43 366 *Am Coll Cardiol* 2015;66(12):1378-91. doi: 10.1016/j.jacc.2015.07.037 [published Online First:  
44 367 2015/09/19]  
45 368 3. Haussmann HJ. Use of hazard indices for a theoretical evaluation of cigarette smoke composition.  
46 369 *Chem Res Toxicol* 2012;25(4):794-810. doi: 10.1021/tx200536w [published Online First:  
47 370 2012/02/23]  
48 371 4. Ghilarducci DP, Tjeerdema RS. Fate and effects of acrolein. *Rev Environ Contam Toxicol* 1995;144:95-  
49 372 146. [published Online First: 1995/01/01]

- 1  
2  
3 373 5. Dong JZ, Moldoveanu SC. Gas chromatography-mass spectrometry of carbonyl compounds in  
4 374 cigarette mainstream smoke after derivatization with 2,4-dinitrophenylhydrazine. *J Chromatogr*  
5 375 *A* 2004;1027(1-2):25-35. [published Online First: 2004/02/20]  
6  
7 376 6. Stepanov I, Jensen J, Hatsukami D, et al. New and traditional smokeless tobacco: comparison of  
8 377 toxicant and carcinogen levels. *Nicotine Tob Res* 2008;10(12):1773-82. doi:  
9 378 10.1080/14622200802443544 [published Online First: 2008/11/22]  
10 379 7. Awe SO, Adeagbo AS, D'Souza SE, et al. Acrolein induces vasodilatation of rodent mesenteric bed via  
11 380 an EDHF-dependent mechanism. *Toxicol Appl Pharmacol* 2006;217(3):266-76. doi:  
12 381 10.1016/j.taap.2006.08.008 [published Online First: 2006/10/31]  
13 382 8. Conklin DJ, Barski OA, Lesgards JF, et al. Acrolein consumption induces systemic dyslipidemia and  
14 383 lipoprotein modification. *Toxicol Appl Pharmacol* 2010;243(1):1-12. doi:  
15 384 10.1016/j.taap.2009.12.010 [published Online First: 2009/12/26]  
16 385 9. Conklin DJ, Bhatnagar A, Cowley HR, et al. Acrolein generation stimulates hypercontraction in isolated  
17 386 human blood vessels. *Toxicol Appl Pharmacol* 2006;217(3):277-88. doi:  
18 387 10.1016/j.taap.2006.09.009 [published Online First: 2006/11/11]  
19 388 10. Conklin DJ, Haberzettl P, Prough RA, et al. Glutathione-S-transferase P protects against endothelial  
20 389 dysfunction induced by exposure to tobacco smoke. *Am J Physiol Heart Circ Physiol*  
21 390 2009;296(5):H1586-97. doi: 10.1152/ajpheart.00867.2008 [published Online First: 2009/03/10]  
22 391 11. Ismahil MA, Hamid T, Haberzettl P, et al. Chronic oral exposure to the aldehyde pollutant acrolein  
23 392 induces dilated cardiomyopathy. *Am J Physiol Heart Circ Physiol* 2011;301(5):H2050-60. doi:  
24 393 10.1152/ajpheart.00120.2011 [published Online First: 2011/09/13]  
25 394 12. O'Toole TE, Hellmann J, Wheat L, et al. Episodic exposure to fine particulate air pollution decreases  
26 395 circulating levels of endothelial progenitor cells. *Circ Res* 2010;107(2):200-3. doi:  
27 396 10.1161/circresaha.110.222679 [published Online First: 2010/07/03]  
28 397 13. O'Toole TE, Zheng YT, Hellmann J, et al. Acrolein activates matrix metalloproteinases by increasing  
29 398 reactive oxygen species in macrophages. *Toxicol Appl Pharmacol* 2009;236(2):194-201. doi:  
30 399 10.1016/j.taap.2009.01.024 [published Online First: 2009/04/18]  
31 400 14. Sithu SD, Srivastava S, Siddiqui MA, et al. Exposure to acrolein by inhalation causes platelet  
32 401 activation. *Toxicol Appl Pharmacol* 2010;248(2):100-10. doi: 10.1016/j.taap.2010.07.013  
33 402 [published Online First: 2010/08/04]  
34 403 15. Srivastava S, Sithu SD, Vladykovskaya E, et al. Oral exposure to acrolein exacerbates atherosclerosis  
35 404 in apoE-null mice. *Atherosclerosis* 2011;215(2):301-8. doi: 10.1016/j.atherosclerosis.2011.01.001  
36 405 [published Online First: 2011/03/05]  
37 406 16. Tsakadze NL, Srivastava S, Awe SO, et al. Acrolein-induced vasomotor responses of rat aorta. *Am J*  
38 407 *Physiol Heart Circ Physiol* 2003;285(2):H727-34. doi: 10.1152/ajpheart.00269.2003 [published  
39 408 Online First: 2003/05/06]  
40 409 17. Wang GW, Guo Y, Vondrisk TM, et al. Acrolein consumption exacerbates myocardial ischemic injury  
41 410 and blocks nitric oxide-induced PKCepsilon signaling and cardioprotection. *J Mol Cell Cardiol*  
42 411 2008;44(6):1016-22. doi: 10.1016/j.yjmcc.2008.03.020 [published Online First: 2008/05/13]  
43 412 18. Wheat LA, Haberzettl P, Hellmann J, et al. Acrolein inhalation prevents vascular endothelial growth  
44 413 factor-induced mobilization of Flk-1+/Sca-1+ cells in mice. *Arterioscler Thromb Vasc Biol*  
45 414 2011;31(7):1598-606. doi: 10.1161/atvbaha.111.227124 [published Online First: 2011/04/30]  
46 415 19. WHO Study Group on Tobacco Product Regulation. Report on the scientific basis of tobacco product  
47 416 regulation: fourth report of a WHO study group. *World Health Organ Tech Rep Ser* 2012(967):1-  
48 417 83, 1 p following 83. [published Online First: 2012/09/08]  
49 418 20. De Woskin R, Greenberg M, Pepelko W, et al. Toxicological review of acrolein (cas no. 107-02-08) in  
50 419 support of summary information on the integrated risk information system (Iris). *Washington,*  
51 420 *DC: US Environmental Protection Agency* 2003

- 1  
2  
3 421 21. Kosmider L, Sobczak A, Fik M, et al. Carbonyl compounds in electronic cigarette vapors: effects of  
4 422 nicotine solvent and battery output voltage. *Nicotine Tob Res* 2014;16(10):1319-26. doi:  
5 423 10.1093/ntr/ntu078 [published Online First: 2014/05/17]  
6  
7 424 22. Goniewicz ML, Knysak J, Gawron M, et al. Levels of selected carcinogens and toxicants in vapour  
8 425 from electronic cigarettes. *Tob Control* 2014;23(2):133-9. doi: 10.1136/tobaccocontrol-2012-  
9 426 050859 [published Online First: 2013/03/08]  
10 427 23. Wang P, Chen W, Liao J, et al. A Device-Independent Evaluation of Carbonyl Emissions from Heated  
11 428 Electronic Cigarette Solvents. *PLoS One* 2017;12(1):e0169811. doi:  
12 429 10.1371/journal.pone.0169811 [published Online First: 2017/01/12]  
13 430 24. Hill JM, Zalos G, Halcox JP, et al. Circulating endothelial progenitor cells, vascular function, and  
14 431 cardiovascular risk. *The New England journal of medicine* 2003;348(7):593-600. doi:  
15 432 10.1056/NEJMoa022287 [published Online First: 2003/02/14]  
16 433 25. Parsons VL, Moriarity C, Jonas K, et al. Design and estimation for the national health interview  
17 434 survey, 2006-2015. *Vital Health Stat 2* 2014(165):1-53. [published Online First: 2014/04/30]  
18 435 26. Alwis KU, Blount BC, Britt AS, et al. Simultaneous analysis of 28 urinary VOC metabolites using ultra  
19 436 high performance liquid chromatography coupled with electrospray ionization tandem mass  
20 437 spectrometry (UPLC-ESI/MSMS). *Anal Chim Acta* 2012;750:152-60. doi:  
21 438 10.1016/j.aca.2012.04.009 [published Online First: 2012/10/16]  
22 439 27. Vasa M, Fichtlscherer S, Aicher A, et al. Number and migratory activity of circulating endothelial  
23 440 progenitor cells inversely correlate with risk factors for coronary artery disease. *Circ Res*  
24 441 2001;89(1):E1-7. [published Online First: 2001/07/07]  
25 442 28. Werner N, Nickenig G. Influence of cardiovascular risk factors on endothelial progenitor cells:  
26 443 limitations for therapy? *Arterioscler Thromb Vasc Biol* 2006;26(2):257-66. doi:  
27 444 10.1161/01.ATV.0000198239.41189.5d [published Online First: 2005/12/03]  
28 445 29. DeJarnett N, Yeager R, Conklin DJ, et al. Residential Proximity to Major Roadways Is Associated With  
29 446 Increased Levels of AC133+ Circulating Angiogenic Cells. *Arteriosclerosis, thrombosis, and*  
30 447 *vascular biology* 2015;35(11):2468-77. doi: 10.1161/atvbaha.115.305724 [published Online First:  
31 448 2015/08/22]  
32 449 30. Poredos P, Orehek M, Tratnik E. Smoking is associated with dose-related increase of intima-media  
33 450 thickness and endothelial dysfunction. *Angiology* 1999;50(3):201-8. [published Online First:  
34 451 1999/03/24]  
35 452 31. Heiss C, Amabile N, Lee AC, et al. Brief secondhand smoke exposure depresses endothelial  
36 453 progenitor cells activity and endothelial function: sustained vascular injury and blunted nitric  
37 454 oxide production. *J Am Coll Cardiol* 2008;51(18):1760-71. doi: 10.1016/j.jacc.2008.01.040  
38 455 [published Online First: 2008/05/03]  
39 456 32. Flammer AJ, Anderson T, Celermajer DS, et al. The assessment of endothelial function: from research  
40 457 into clinical practice. *Circulation* 2012;126(6):753-67. doi: 10.1161/circulationaha.112.093245  
41 458 [published Online First: 2012/08/08]  
42 459 33. Benjamin EJ, Larson MG, Keyes MJ, et al. Clinical correlates and heritability of flow-mediated dilation  
43 460 in the community: the Framingham Heart Study. *Circulation* 2004;109(5):613-9. doi:  
44 461 10.1161/01.cir.0000112565.60887.1e [published Online First: 2004/02/11]  
45 462 34. Vita JA. Nitric oxide-dependent vasodilation in human subjects. *Methods Enzymol* 2002;359:186-200.  
46 463 [published Online First: 2002/12/17]  
47 464 35. Mitchell GF, Guo CY, Benjamin EJ, et al. Cross-sectional correlates of increased aortic stiffness in the  
48 465 community: the Framingham Heart Study. *Circulation* 2007;115(20):2628-36. doi:  
49 466 10.1161/circulationaha.106.667733 [published Online First: 2007/05/09]  
50  
51  
52  
53  
54  
55  
56  
57  
58  
59  
60



- 1  
2  
3 467 36. Duffy SJ, Keaney Jr JF, Holbrook M, et al. Short-and long-term black tea consumption reverses  
4 468 endothelial dysfunction in patients with coronary artery disease. *Circulation* 2001;104(2):151-  
5 469 56.
- 6 470 37. Benowitz NL, Dains KM, Dempsey D, et al. Racial differences in the relationship between number of  
7 471 cigarettes smoked and nicotine and carcinogen exposure. *Nicotine Tob Res* 2011;13(9):772-83.  
8 472 doi: 10.1093/ntr/ntr072 [published Online First: 2011/05/07]
- 9 473 38. Schoenborn CA, Gindi RM. Electronic Cigarette Use Among Adults: United States, 2014. *NCHS Data*  
10 474 *Brief* 2015(217):1-8. [published Online First: 2015/11/12]
- 11 475 39. Maher J, Boysun M, Rohde K, et al. Are Latinos really less likely to be smokers? Lessons from Oregon.  
12 476 *Nicotine & Tobacco Research* 2005;7(2):283-87. doi: 10.1080/14622200500056259
- 13 477 40. Barbeau EM, Krieger N, Soobader M-J. Working Class Matters: Socioeconomic Disadvantage,  
14 478 Race/Ethnicity, Gender, and Smoking in NHIS 2000. *Am J Public Health* 2004;94(2):269-78. doi:  
15 479 10.2105/AJPH.94.2.269
- 16 480 41. Giskes K, Kunst AE, Benach J, et al. Trends in smoking behaviour between 1985 and 2000 in nine  
17 481 European countries by education. *Journal of Epidemiology and Community Health*  
18 482 2005;59(5):395.

### 21 22 483 **Figure 1. Cardiovascular Injury due to Tobacco Use**

23  
24 484 CITU is designed to assess how tobacco related VOC exposure contributes to  
25 485 cardiovascular risk factors. Our exposure measurements include a panel of 23  
26 486 urinary metabolites of 18 parent VOCs and tobacco use patterns. Cardiovascular  
27 487 phenotyping includes measures of injury, risk, vascular biomarkers and early  
28 488 vascular dysfunction. Tobacco use included use of traditional cigarettes,  
29 489 smokeless tobacco, waterpipe tobacco (hookah), electronic nicotine devices  
30 490 (ENDS), little cigars, cigarillos, pipes, cigars or any other form of tobacco that is  
31 491 available. Enrollment began in July 2014 and is ongoing.

### 34 492 **Figure 2. Study Visit Design**

35  
36 493 Study flow chart for interested participants from screening through study completion.  
37 494 Potential participants are pre-screened for eligibility prior to enrollment. Potential  
38 495 participants are asked to fast from tobacco for a minimum of 6 hours prior to the  
39 496 study visit. On the day of the visit the study lasts approximately 90 minute.

40  
41  
42  
43  
44  
45  
46  
47  
48  
49  
50  
51  
52  
53  
54  
55  
56  
57  
58  
59  
60

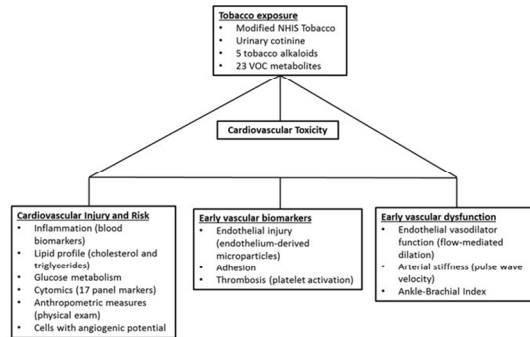

CITU is designed to assess how tobacco related VOC exposure contributes to cardiovascular risk factors. Our exposure measurements include a panel of 23 urinary metabolites of 18 parent VOCs and tobacco use patterns. Cardiovascular phenotyping includes measures of injury, risk, vascular biomarkers and early vascular dysfunction. Tobacco use included use of traditional cigarettes, smokeless tobacco, waterpipe tobacco (hookah), electronic nicotine devices (ENDS), little cigars, cigarillos, pipes, cigars or any other form of tobacco that is available. Enrollment began in July 2014 and is ongoing.

338x190mm (96 x 96 DPI)

1  
2  
3  
4  
5  
6  
7  
8  
9  
10  
11  
12  
13  
14  
15  
16  
17  
18  
19  
20  
21  
22  
23  
24  
25  
26  
27  
28  
29  
30  
31  
32  
33  
34  
35  
36  
37  
38  
39  
40  
41  
42  
43  
44  
45  
46  
47  
48  
49  
50  
51  
52  
53  
54  
55  
56  
57  
58  
59  
60

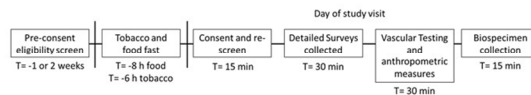

Study flow chart for interested participants from screening through study completion. Potential participants are pre-screened for eligibility prior to enrollment. Potential participants are asked to fast from tobacco for a minimum of 6 hours prior to the study visit. On the day of the visit the study lasts approximately 90 minute.

338x190mm (96 x 96 DPI)

**STROBE 2007 (v4) Statement—Checklist of items that should be included in reports of *cohort studies***

| Section/Topic            | Item # | Recommendation                                                                                                                                                                       | Reported on page #   |
|--------------------------|--------|--------------------------------------------------------------------------------------------------------------------------------------------------------------------------------------|----------------------|
| Title and abstract       | 1      | (a) Indicate the study's design with a commonly used term in the title or the abstract                                                                                               | 1                    |
|                          |        | (b) Provide in the abstract an informative and balanced summary of what was done and what was found                                                                                  | 2-3                  |
| <b>Introduction</b>      |        |                                                                                                                                                                                      |                      |
| Background/rationale     | 2      | Explain the scientific background and rationale for the investigation being reported                                                                                                 | 3-4                  |
| Objectives               | 3      | State specific objectives, including any prespecified hypotheses                                                                                                                     | 5                    |
| <b>Methods</b>           |        |                                                                                                                                                                                      |                      |
| Study design             | 4      | Present key elements of study design early in the paper                                                                                                                              | 5, 7                 |
| Setting                  | 5      | Describe the setting, locations, and relevant dates, including periods of recruitment, exposure, follow-up, and data collection                                                      | 5, 7                 |
| Participants             | 6      | (a) Give the eligibility criteria, and the sources and methods of selection of participants. Describe methods of follow-up                                                           | 6-7                  |
|                          |        | (b) For matched studies, give matching criteria and number of exposed and unexposed                                                                                                  | N/A                  |
| Variables                | 7      | Clearly define all outcomes, exposures, predictors, potential confounders, and effect modifiers. Give diagnostic criteria, if applicable                                             | 7-12                 |
| Data sources/measurement | 8*     | For each variable of interest, give sources of data and details of methods of assessment (measurement). Describe comparability of assessment methods if there is more than one group | 7-12                 |
| Bias                     | 9      | Describe any efforts to address potential sources of bias                                                                                                                            | 7                    |
| Study size               | 10     | Explain how the study size was arrived at                                                                                                                                            | 14-16                |
| Quantitative variables   | 11     | Explain how quantitative variables were handled in the analyses. If applicable, describe which groupings were chosen and why                                                         | 12-14                |
| Statistical methods      | 12     | (a) Describe all statistical methods, including those used to control for confounding                                                                                                | 12-14                |
|                          |        | (b) Describe any methods used to examine subgroups and interactions                                                                                                                  | 13                   |
|                          |        | (c) Explain how missing data were addressed                                                                                                                                          | 13                   |
|                          |        | (d) If applicable, explain how loss to follow-up was addressed                                                                                                                       | N/A (study protocol) |
|                          |        | (e) Describe any sensitivity analyses                                                                                                                                                | 13                   |
| <b>Results</b>           |        |                                                                                                                                                                                      |                      |

|                          |     |                                                                                                                                                                                                              |                      |
|--------------------------|-----|--------------------------------------------------------------------------------------------------------------------------------------------------------------------------------------------------------------|----------------------|
| Participants             | 13* | (a) Report numbers of individuals at each stage of study—eg numbers potentially eligible, examined for eligibility, confirmed eligible, included in the study, completing follow-up, and analysed            | N/A (study protocol) |
|                          |     | (b) Give reasons for non-participation at each stage                                                                                                                                                         | N/A (study protocol) |
|                          |     | (c) Consider use of a flow diagram                                                                                                                                                                           | N/A (study protocol) |
| Descriptive data         | 14* | (a) Give characteristics of study participants (eg demographic, clinical, social) and information on exposures and potential confounders                                                                     | N/A (study protocol) |
|                          |     | (b) Indicate number of participants with missing data for each variable of interest                                                                                                                          | N/A (study protocol) |
|                          |     | (c) Summarise follow-up time (eg, average and total amount)                                                                                                                                                  | N/A (study protocol) |
| Outcome data             | 15* | Report numbers of outcome events or summary measures over time                                                                                                                                               | N/A (study protocol) |
| Main results             | 16  | (a) Give unadjusted estimates and, if applicable, confounder-adjusted estimates and their precision (eg, 95% confidence interval). Make clear which confounders were adjusted for and why they were included | N/A (study protocol) |
|                          |     | (b) Report category boundaries when continuous variables were categorized                                                                                                                                    | N/A (study protocol) |
|                          |     | (c) If relevant, consider translating estimates of relative risk into absolute risk for a meaningful time period                                                                                             | N/A (study protocol) |
| Other analyses           | 17  | Report other analyses done—eg analyses of subgroups and interactions, and sensitivity analyses                                                                                                               | N/A (study protocol) |
| <b>Discussion</b>        |     |                                                                                                                                                                                                              |                      |
| Key results              | 18  | Summarise key results with reference to study objectives                                                                                                                                                     | N/A (study protocol) |
| <b>Limitations</b>       |     |                                                                                                                                                                                                              |                      |
| Interpretation           | 20  | Give a cautious overall interpretation of results considering objectives, limitations, multiplicity of analyses, results from similar studies, and other relevant evidence                                   | 17                   |
| Generalisability         | 21  | Discuss the generalisability (external validity) of the study results                                                                                                                                        |                      |
| <b>Other information</b> |     |                                                                                                                                                                                                              |                      |
| Funding                  | 22  | Give the source of funding and the role of the funders for the present study and, if applicable, for the original study on which the present article is based                                                | 19                   |

\*Give information separately for cases and controls in case-control studies and, if applicable, for exposed and unexposed groups in cohort and cross-sectional studies.

**Note:** An Explanation and Elaboration article discusses each checklist item and gives methodological background and published examples of transparent reporting. The STROBE checklist is best used in conjunction with this article (freely available on the Web sites of PLoS Medicine at <http://www.plosmedicine.org/>, Annals of Internal Medicine at <http://www.annals.org/>, and Epidemiology at <http://www.epidem.com/>). Information on the STROBE Initiative is available at [www.strobe-statement.org](http://www.strobe-statement.org).

# BMJ Open

## Protocol to Assess the Impact of Tobacco-Induced Volatile Organic Compounds on Cardiovascular Risk in a Cross-Sectional Cohort: Cardiovascular Injury Due to Tobacco Study

|                                 |                                                                                                                                                                                                                                                                                                                                                                                                                                                                                                                                                                                                                                                                                                                                                                                                                                                                                                                                                                                                                                                                                                                                                                                                                                                                                                                                                                                                                                            |
|---------------------------------|--------------------------------------------------------------------------------------------------------------------------------------------------------------------------------------------------------------------------------------------------------------------------------------------------------------------------------------------------------------------------------------------------------------------------------------------------------------------------------------------------------------------------------------------------------------------------------------------------------------------------------------------------------------------------------------------------------------------------------------------------------------------------------------------------------------------------------------------------------------------------------------------------------------------------------------------------------------------------------------------------------------------------------------------------------------------------------------------------------------------------------------------------------------------------------------------------------------------------------------------------------------------------------------------------------------------------------------------------------------------------------------------------------------------------------------------|
| Journal:                        | <i>BMJ Open</i>                                                                                                                                                                                                                                                                                                                                                                                                                                                                                                                                                                                                                                                                                                                                                                                                                                                                                                                                                                                                                                                                                                                                                                                                                                                                                                                                                                                                                            |
| Manuscript ID                   | bmjopen-2017-019850.R2                                                                                                                                                                                                                                                                                                                                                                                                                                                                                                                                                                                                                                                                                                                                                                                                                                                                                                                                                                                                                                                                                                                                                                                                                                                                                                                                                                                                                     |
| Article Type:                   | Protocol                                                                                                                                                                                                                                                                                                                                                                                                                                                                                                                                                                                                                                                                                                                                                                                                                                                                                                                                                                                                                                                                                                                                                                                                                                                                                                                                                                                                                                   |
| Date Submitted by the Author:   | 14-Feb-2018                                                                                                                                                                                                                                                                                                                                                                                                                                                                                                                                                                                                                                                                                                                                                                                                                                                                                                                                                                                                                                                                                                                                                                                                                                                                                                                                                                                                                                |
| Complete List of Authors:       | Keith, Rachel; University of Louisville, Medicine; American Heart Association- Tobacco Regulation and Addiction Center<br>Fetterman, Jessica; Boston Medical Center, Vascular Biology Section, Whitaker Cardiovascular Institute; American Heart Association- Tobacco Regulation and Addiction Center<br>Riggs, Daniel; American Heart Association- Tobacco Regulation and Addiction Center; University of Louisville, Medicine<br>O'Toole, Timothy; University of Louisville, Medicine; American Heart Association- Tobacco Regulation and Addiction Center<br>Nystoriak, Jessica; University of Louisville, Medicine; American Heart Association- Tobacco Regulation and Addiction Center<br>Holbrook, Monika; Boston Medical Center, Vascular Biology Section, Whitaker Cardiovascular Institute; American Heart Association- Tobacco Regulation and Addiction Center<br>Lorkiewicz, Pawel; University of Louisville, Medicine; American Heart Association- Tobacco Regulation and Addiction Center<br>Bhatnagar, Aruni; University of Louisville, Medicine; American Heart Association- Tobacco Regulation and Addiction Center<br>DeFilippis, Andrew; University of Louisville, Medicine; American Heart Association- Tobacco Regulation and Addiction Center<br>Hamburg, Naomi ; Boston University, Vascular Biology Section, Whitaker Cardiovascular Institute; American Heart Association- Tobacco Regulation and Addiction Center |
| <b>Primary Subject Heading</b>: | Cardiovascular medicine                                                                                                                                                                                                                                                                                                                                                                                                                                                                                                                                                                                                                                                                                                                                                                                                                                                                                                                                                                                                                                                                                                                                                                                                                                                                                                                                                                                                                    |
| Secondary Subject Heading:      | Public health                                                                                                                                                                                                                                                                                                                                                                                                                                                                                                                                                                                                                                                                                                                                                                                                                                                                                                                                                                                                                                                                                                                                                                                                                                                                                                                                                                                                                              |
| Keywords:                       | smoking, tobacco, electronic cigarette, cardiovascular risk, vascular injury, cigarettes                                                                                                                                                                                                                                                                                                                                                                                                                                                                                                                                                                                                                                                                                                                                                                                                                                                                                                                                                                                                                                                                                                                                                                                                                                                                                                                                                   |
|                                 |                                                                                                                                                                                                                                                                                                                                                                                                                                                                                                                                                                                                                                                                                                                                                                                                                                                                                                                                                                                                                                                                                                                                                                                                                                                                                                                                                                                                                                            |

SCHOLARONE™  
Manuscripts

1  
2  
3 1 **Protocol to Assess the Impact of Tobacco-Induced Volatile Organic Compounds**  
4  
5 2 **on Cardiovascular Risk in a Cross-Sectional Cohort: Cardiovascular Injury Due to**  
6  
7 **Tobacco Study**  
8  
9

10 4 Rachel J. Keith, Jessica L. Fetterman, Daniel W. Riggs, Tim O'Toole, Jessica Nystoriak,  
11  
12 5 Monica Holbrook, Pawel Lorkiewicz, Aruni Bhatnagar, Andrew DeFilippis\*, Naomi M.  
13  
14 6  
15 6 Hamburg\*

16  
17 7 Rachel J. Keith-Division of Cardiovascular Medicine, University of Louisville School of  
18  
19 8 Medicine 580 S. Preston St. Louisville KY, 40202 [rachel.keith@louisville.edu](mailto:rachel.keith@louisville.edu) 502-852-  
20  
21 9 4211

22  
23  
24 10 Jessica L. Fetterman- Vascular Biology Section, Whitaker Cardiovascular Institute,  
25  
26 11 Boston University School of Medicine Evans Building, Boston, MA USA

27  
28 12 Daniel W. Riggs- University of Louisville School of Medicine Louisville, KY USA

29  
30  
31 13 Timothy O-Toole- Division of Cardiovascular Medicine, University of Louisville School of  
32  
33 14 Medicine Louisville, KY USA

34  
35 15 Jessica L. Nystoriak- Division of Cardiovascular Medicine, University of Louisville  
36  
37 16 School of Medicine Louisville, KY USA

38  
39  
40 17 Monika Holbrook- Vascular Biology Section, Whitaker Cardiovascular Institute, Boston  
41  
42 18 University School of Medicine Boston, MA USA

43  
44 19 Pawel Lorkiewicz- Division of Cardiovascular Medicine, University of Louisville School  
45  
46 20 of Medicine Louisville, KY USA

47  
48  
49 21 Aruni Bhatnagar- Division of Cardiovascular Medicine, University of Louisville School of  
50  
51 22 Medicine Louisville, KY USA

23 Andrew P. DeFilippis- Division of Cardiovascular Medicine, University of Louisville  
24 School of Medicine Louisville, KY USA (co-senior author)

25 Naomi M. Hamburg- Vascular Biology Section, Whitaker Cardiovascular Institute,  
26 Boston University School of Medicine Boston, MA USA (co-senior author)

28 **Word Count: 2581**

## 30 **ABSTRACT**

31 **Introduction:** Tobacco use leads to increased mortality, the majority of which is  
32 attributed to cardiovascular disease. Despite this knowledge, the early cardiovascular  
33 impact of tobacco product use is not well understood. Tobacco use increases exposure  
34 to harmful and potentially harmful constituents including volatile organic compounds  
35 (VOCs) such as acrolein and crotonaldehyde, which may contribute to cardiovascular  
36 risk. The link between exposure patterns, risk profiles and demographic distribution of  
37 tobacco product users, particularly users of new and emerging products, are not well  
38 known. Therefore, we designed the Cardiovascular Injury due to Tobacco Use (CITU)  
39 study to assess population characteristics, demographic features, exposure patterns  
40 and cardiovascular risk in relation to tobacco.

41 **Methods and analysis:** We present the design and methodology of the CITU study a  
42 cross-section observational tobacco study conducted in Boston MA and Louisville KY  
43 starting in 2014. Healthy participants 21 to 45 years of age who use tobacco products,  
44 including ENDS, or who never used tobacco are being recruited. The study aims to  
45 recruit an evenly split cohort of African Americans and Caucasians that is sex balanced



1  
2  
3 46 for evaluation of self-reported tobacco exposure, VOC exposure and tobacco-induced  
4  
5 47 injury profiling. Detailed information about participant's demographics, health status and  
6  
7 48 lifestyle is also collected.  
8  
9

10 49 **Ethics and dissemination:** The study protocol was approved institutional review  
11  
12 50 boards at both participating universities. All study protocols will protect participant  
13  
14 51 confidentiality. Results from the study will be disseminated via peer-reviewed journals  
15  
16 52 and presented at scientific conferences.  
17  
18  
19  
20  
21

## 22 54 **Strengths and limitations**

- 23  
24 55 • Young age to allow for evaluation of early stage disease (e.g. inflammation,  
25  
26 56 endothelial function) as opposed to end stage clinical consequence (e.g.  
27  
28 57 myocardial infarction)
- 29  
30 58 • Diverse tobacco product use allows for assessment of a wide range of tobacco-  
31  
32 59 induced VOC exposure
- 33  
34 60 • All study visits are in English introducing selection bias
- 35  
36 61 • Data will inform regulatory agencies on the cardiovascular health effects of  
37  
38 62 multiple tobacco products and the contribution of HPHCs  
39  
40  
41  
42  
43  
44

45 64 **Keywords:** Tobacco, smoking, electronic cigarette, vascular injury, cardiovascular risk,  
46  
47 65 cigarettes.  
48  
49  
50  
51

## 52 67 **INTRODUCTION**

53  
54  
55  
56  
57  
58  
59  
60

1  
2  
3 68 Tobacco product use and smoking are the leading causes of preventable deaths  
4  
5 69 throughout the world. Of those deaths, one-third are attributed to cardiovascular disease  
6  
7 70 (CVD)<sup>1</sup>. The cardiovascular (CV) effects of tobacco exposure can include  
8  
9  
10 71 atherogenesis, vascular injury, thrombosis, arrhythmias and inflammation<sup>2</sup> and may be  
11  
12 72 attributable to the many different harmful and potentially harmful constituents (HPHCs)  
13  
14  
15 73 present in tobacco products.

16  
17 74 The HPHCs found in tobacco products include volatile organic compounds  
18  
19 75 (VOCs) of which reactive aldehydes, such as acrolein and crotonaldehyde, are likely the  
20  
21 76 most significant contributors to CV toxicity<sup>3</sup>. High levels of aldehydes are present in  
22  
23 77 cigarette smoke<sup>4,5</sup> as well as smokeless tobacco (ST)<sup>6</sup>. Risk assessments, using the  
24  
25 78 prevalence of each individual chemical weighed by its potency, suggest that the non-  
26  
27 79 cancer risk of smoking is dominated by acrolein, which contributes 40-100 times more  
28  
29 80 to risk than any other chemical present in cigarette smoke<sup>3</sup>.

30  
31  
32  
33 81 Although HPHCs, including VOC reactive aldehydes, have been suspected to be  
34  
35 82 major contributors to the toxicity of cigarette smoke for over 4 decades, their  
36  
37 83 contribution to CV injury and early CVD risk has not been rigorously evaluated.  
38  
39 84 Experimental studies in animal models suggest that because of low aldehyde-  
40  
41 85 metabolizing capacity, CV tissues are highly sensitive to aldehydes and exposure to low  
42  
43 86 levels of aldehydes can induce CV injury and accelerate CVD<sup>7-18</sup>. The WHO Study  
44  
45 87 Group on Tobacco Product Regulation (TobReg) has marked acrolein, a VOC, along  
46  
47 88 with 8 other cigarette constituents for monitoring and regulation<sup>19</sup> and the U.S.  
48  
49 89 Environmental Protection Agency lists Acrolein as one of most hazardous air  
50  
51 90 pollutants<sup>20</sup>. Nevertheless, the contribution of tobacco induced VOCs, including acrolein

1  
2  
3 91 or other aldehydes, toward CV toxicity in humans has not been fully assessed. Greater  
4  
5 92 understanding of how aldehydes affect cardiovascular health and disease will provide  
6  
7 93 new avenues for evaluating the toxicity of cigarette smoke and for assessing the  
8  
9 94 injurious potential of new and emerging tobacco products, such as ENDS, which may  
10  
11 95 also contain VOCs including acrolein<sup>21-23</sup>.  
12  
13

14 96 The latency period between tobacco exposure and the development of major  
15  
16 97 clinical adverse health effects is long, therefore biomarkers that provide information over  
17  
18 98 a shorter period allow for the identification of harm decades before clinical outcome data  
19  
20 99 is available. Thus, in this paper we present the design and methodology of the  
21  
22 100 Cardiovascular Injury due To Tobacco Use (CITU) study which will evaluate the  
23  
24 101 association of the urinary metabolites of 18 parent VOCs from tobacco exposure with a  
25  
26 102 comprehensive set of CV biomarkers representative of early disease and predictive of  
27  
28 103 future CV events.<sup>24</sup>  
29  
30  
31  
32

## 33 104 **METHODS AND DESIGN**

### 35 105 **Overall design**

37 106 The CITU study is an investigator-initiated cross-sectional observational study of  
38  
39 107 around 500 healthy participants 21 to 45 years of age who are never or current tobacco  
40  
41 108 product users in two urban areas at Boston University (BU) and University of Louisville  
42  
43 109 (UofL) (Boston, MA and Louisville, KY) designed to evaluate CV toxicity due to tobacco  
44  
45 110 product use, with correlations to VOCs found in the tobacco products (**Figure 1**).  
46  
47  
48

49 111

50 112

### 54 113 **Participant Eligibility Criteria**

1  
2  
3 114 The goal of the study is to examine the impact of tobacco products on healthy  
4  
5 115 young adults who could be classified as a current tobacco product users (Defined in  
6  
7 116 table 1), or never-users (does not have lifetime use of any tobacco product).  
8  
9  
10 117 Participants were self-reported to be healthy therefore we excluded participants if they  
11  
12 118 had: 1) diagnosis of clinical cardiovascular disease including but not limited to known  
13  
14 119 heart attack, peripheral artery disease, heart failure or stroke; 2) diagnosis of diabetes  
15  
16 120 (HbA1c >7.0 or treatment for diabetes), hypertension (systolic blood pressure >140 mm  
17  
18 121 Hg or diastolic blood pressure >90 mm Hg), hypothyroidism or hyperthyroidism,  
19  
20 122 inflammatory conditions such as lupus or inflammatory bowel disease, HIV/AIDS,  
21  
22 123 hepatitis, liver disease, anemia, cancer of any type or another medical condition that  
23  
24 124 might compromise the successful completion of the study; 2) recipients of organ  
25  
26 125 transplant or renal replacement therapy; 3) individuals that are taking the following  
27  
28 126 medications: immunosuppressant agents estrogen, testosterone, anti TNF agents,  
29  
30 127 certain biologics, Procrit, statins, beta-blockers or other cardiovascular medicine; 4)  
31  
32 128 individuals using nutraceuticals or anabolic steroids beyond the recommended daily  
33  
34 129 allowance; 5) body weight less than 100 pounds; 6) pregnant women; 7) prisoners and  
35  
36 130 other vulnerable populations; and 8) active illness or infection. Participants are  
37  
38 131 rescheduled or considered screen-failures and excluded from the study if symptomatic  
39  
40 132 of an acute illness, i.e. viral upper respiratory infection, on study date.  
41  
42  
43  
44  
45  
46

47 **Table 1. Tobacco product use classifications**

| Classification         | Qualification                                                       |
|------------------------|---------------------------------------------------------------------|
| Never                  | Does not meet lifetime limits for any tobacco use (see below)       |
| Smoker                 | >100 lifetime cigarettes and current use for the past year          |
| Smokeless Tobacco User | >20 lifetime dips or chews and current use for the past year        |
| Cigar/Cigarillo User   | >20 lifetime cigars or cigarillos and current use for the past year |
| Pipe User              | >20 lifetime pipefuls and current use for the past year             |

|             |                                                                |
|-------------|----------------------------------------------------------------|
| ENDS User   | >20 lifetime vape sessions and current use for the past year   |
| Hookah User | >20 lifetime hookah sessions and current use for the past year |

134 *Study participants are screened prior to enrollment for current and past tobacco product*  
 135 *use. Participants are characterized and assigned a use group based on self-reported*  
 136 *patterns collected during the study visits.*

### 137 **Overall Study Procedure**

138 Study participants fast for 8 h from food and 6 h from tobacco prior to the visit. All  
 139 study visits occur before 11AM to limit effects due to circadian changes. All vascular  
 140 function studies are completed after 10 min of supine positioning. All vascular studies  
 141 are sent to the BU central lab for analysis. BU biologic samples have minimal  
 142 processing and are shipped overnight to the UofL central laboratory at the completion of  
 143 each study visit. Samples obtained at UofL are processed to a similar stage, then held  
 144 overnight prior to analysis for standardization of time to measurement for all samples.

145 Study visits take approximately 90 minutes to complete and include a structured  
 146 interview on demographics, socioeconomics, lifestyle, health, family history of heart  
 147 disease, allergies, and tobacco use. (**Figure 2**) Participants were compensated  
 148 appropriately for their time. All surveys are collected and kept in Research Electronic  
 149 Data Capture (REDCap), a secure web application for building and managing online  
 150 surveys and databases.

### 151 **Exposure Variables**

#### 152 Tobacco Product Use & Particulate Matter Exposure

153 Comprehensive tobacco product exposure is assessed using a modified version  
 154 of the National Health Interview survey on tobacco use<sup>25</sup>. The survey is modified to  
 155 include detailed information on electronic nicotine devices (ENDs) and other new or

1  
2  
3 156 emerging tobacco products. Residential addresses are collected for assessment of  
4  
5 157 ambient airborne particulate matter (PM<sub>2.5</sub>) exposure and future correction of overall  
6  
7 158 exposure. PM<sub>2.5</sub> data from the day of the study visit, and 3 and 5 days prior to the study  
8  
9  
10 159 is collected from publicly available data associated with EPA monitoring stations. Other  
11  
12 160 exposure variables, including occupation, are collected through interview.

### 14 161 VOC Measurements

16 162 Humans are exposed to VOCs from a variety of sources including indoor and  
17  
18 163 outdoor environments as well as diet. The most significant sources of ambient exposure  
19  
20 164 ambient are air pollution, car exhaust, household products, personal hygiene products,  
21  
22 165 and solvents<sup>26 27</sup>. Although concurrent exposures from multiple sources could confound  
23  
24 166 attribution to smoking, the levels of urinary metabolites of these VOCs in smokers far  
25  
26 167 exceeds those measured in non-smokers exposed to typical sources of VOCs<sup>28</sup>.

27  
28  
29 168 Standard clean catch urine specimens are obtained from participants. Though  
30  
31 169 only a single urine time point is collected, previous studies show spot urine  
32  
33 170 measurements correlate well with 24-hour urine collections<sup>29</sup>. Many VOC metabolites  
34  
35 171 have relatively short half-lives that range from 2 - 25.2h,<sup>30 31</sup> but given the constant  
36  
37 172 pattern of tobacco product use by most users, spot collection reflects recurrent use.  
38  
39 173 Moreover, even though some VOC metabolites, such as HPMA, are known vary with  
40  
41 174 time of day,<sup>29</sup> synchronizing the study visits and requiring a tobacco fast is likely to  
42  
43 175 minimize diurnal variations in metabolism. Our past work has shown that spot-urine  
44  
45 176 collected at the same time of day reliably reflects daily VOC exposure and is correlated  
46  
47 177 to CVD risk<sup>32</sup>.

178 We have developed a robust Core Lab that utilizes mass spectrometry  
 179 procedures adopted from the Centers for Disease Control and Prevention (CDC)  
 180 protocols, to quantify 23 urinary metabolites of tobacco smoking related toxins  
 181 (aldehydes and other VOCs), including acrolein<sup>33</sup> (**Table 2**). The concentration values of  
 182 analytes are then normalized to urinary creatinine levels measured using Infinity  
 183 Creatinine Reagent (Thermo Fisher Scientific, MA) on a COBAS MIRA-plus analyzer  
 184 (Roche, NJ).

185 **Table 2 Exposure Variables (Please see end of article)**

| <i><b>Parent compound</b></i>                    | <i><b>VOC metabolite</b></i>                       | <i><b>Common<br/>abbr.</b></i> |
|--------------------------------------------------|----------------------------------------------------|--------------------------------|
| Acetaldehyde                                     | Acetic acid/Acetate                                | ACETATE                        |
| Acrolein                                         | N-Acetyl-S-(2-carboxyethyl)-L-cysteine             | CEMA                           |
|                                                  | N-Acetyl-S-(3-hydroxypropyl)-L-cysteine            | 3HPMA                          |
| Acrylamide                                       | N-Acetyl-S-(2-carbamoyl-ethyl)-L-cysteine          | AAMA                           |
|                                                  | N-Acetyl-S-(2-carbamoyl-2-hydroxyethyl)-L-cysteine | GAMA                           |
| Acrylonitrile                                    | N-Acetyl-S-(2-cyanoethyl)-L-cysteine               | CYMA                           |
| Acrylonitrile, vinyl chloride,<br>ethylene oxide | N-Acetyl-S-(2-hydroxyethyl)-L-cysteine             | HEMA                           |
| Anabasine                                        | Anabasine (free)                                   | ANB                            |
| Anatabine                                        | Anatabine (free)                                   | ANTB                           |
| Benzene                                          | N-Acetyl-S-(phenyl)-L-cysteine                     | PMA                            |
|                                                  | trans, trans-Muconic acid                          | MU                             |

|                       |                                                    |          |
|-----------------------|----------------------------------------------------|----------|
| 1-Bromopropane        | N-Acetyl-S-(n-propyl)-L-cysteine                   | BPMA     |
| 1,3-Butadiene         | N-Acetyl-S-(3,4-dihydroxybutyl)-L-cysteine         | DHBMA    |
|                       | N-Acetyl-S-(1-hydroxymethyl-2-propenyl)-L-cysteine | MHBMA1   |
|                       | N-Acetyl-S-(2-hydroxy-3-butenyl)-L-cysteine        | MHBMA2   |
|                       | N-Acetyl-S-(4-hydroxy-2-buten-1-yl)-L-cysteine     | MHBMA3   |
| Carbon-disulfide      | 2-Thioxothiazolidine-4-carboxylic acid             | TTCA     |
| Crotonaldehyde        | N-Acetyl-S-(3-hydroxypropyl-1-methyl)-L-cysteine   | HPMMA    |
| Cyanide               | 2-Aminothiazoline-4-carboxylic acid                | ATCA     |
| N,N-Dimethylformamide | N-Acetyl-S-(N-methylcarbamoyl)-L-cysteine          | AMCC     |
| Ethylbenzene, styrene | Phenylglyoxylic acid                               | PGA      |
| Formaldehyde          | Formate                                            | FORMATE  |
| Nicotine              | Nicotine                                           | NIC      |
|                       | Cotinine                                           | COT      |
|                       | 3-Hydroxycotinine                                  | 3HC      |
| Propylene oxide       | N-Acetyl-S-(2-hydroxypropyl)-L-cysteine            | 2HPMA    |
| Styrene               | N-Acetyl-S-(1-phenyl-2-hydroxyethyl)-L-cysteine +  | PHEMA    |
|                       | N-Acetyl-S-(2-phenyl-2-hydroxyethyl)-L-cysteine    |          |
|                       | Mandelic acid                                      | MA       |
| Tetrachloroethylene   | N-Acetyl-S-(trichlorovinyl)-L-cysteine             | TCVMA    |
| Toluene               | N-Acetyl-S-(benzyl)-L-cysteine                     | BMA      |
| Trichloroethylene     | N-Acetyl-S-(1,2-dichlorovinyl)-L-cysteine          | 1,2DCVMA |
|                       | N-Acetyl-S-(2,2-dichlorovinyl)-L-cysteine          | 2,2DCVMA |



|        |                                                                                                                                            |            |
|--------|--------------------------------------------------------------------------------------------------------------------------------------------|------------|
| Xylene | N-Acetyl-S-(2,4-dimethylphenyl)-L-cysteine +<br>N-Acetyl-S-(2,5-dimethylphenyl)-L-cysteine +<br>N-Acetyl-S-(3,4-dimethylphenyl)-L-cysteine | DPMA       |
|        | 2-Methylhippuric acid                                                                                                                      | 2MHA       |
|        | 3-Methylhippuric acid + 4-Methylhippuric acid                                                                                              | 3MHA+ 4MHA |
|        |                                                                                                                                            |            |

186

187 *Urine is analyzed for 23 metabolites of 18 parent VOCs and tobacco alkaloids by UPLC-*

188 *MS/MS. Analytes are listed as parent, metabolite and their common abbreviation.*

189

### 190 **Circulating Markers of Cardiovascular Injury**

191 To assess tobacco product-induced cardiovascular toxicity, we examine  
 192 endothelial function, inflammatory mediators, biomarkers, and thrombosis. CV risk is  
 193 defined through measurements of circulating angiogenic cells, lipid profile, and glucose  
 194 metabolism<sup>24 34 35</sup>. Plasma (BD367863 and BD366415) and serum (BD367814)  
 195 samples are obtained from all participants for laboratory testing and long term  
 196 biobanking. Whole blood (BD366415) is obtained for flow cytometry on fresh samples at  
 197 UofL pathology core. BU biologic samples have minimal processing and are shipped  
 198 overnight to the UofL central laboratory at the completion of each study visit. Samples  
 199 obtained at UofL are processed to a similar stage, then held overnight prior to analysis  
 200 to standardize the time to measurement for all samples. The UofL central laboratory, as  
 201 previously reported, will complete fasting and biomarker measurements (**Table 3**), with  
 202 the exception of cytomics<sup>12 36</sup>. For cytomic measurements, mononuclear cells are  
 203 labeled with the peripheral blood phenotyping panel kit (Fluidigm). Samples are shipped

204 at 4 degree C to Core Lab facilities at the University of Rochester for Mass cytometric  
205 analysis.

### 206 **Table 3 Blood analysis**

#### **Fasting Measurements**

LDL cholesterol, HDL cholesterol, total cholesterol, triglycerides, glucose, uric acid, SAA and fibrinogen

#### **Biomarkers**

CAC (1-15)<sup>1</sup>, Platelet-monocyte aggregates, MP (1-5)<sup>1</sup>, PF4, t-PA, TxA2, Factor VII, IL-6, CRP, D-dimer, PAI-1, s-ICAM-1, s-VCAM, s-thrombomodulin, s-TNFR1, MMP-2, MMP-3, MMP-9, cytomics, endothelin, E-selectin and P-selectin

1: Fifteen different CAP subpopulations and 5 subtypes of microparticles were measured by flow cytometry.

207 *All participants who complete the study visit will have blood samples taken and*  
208 *processed. Flow cytometric analysis is completed on fresh samples. All other analysis*  
209 *will be completed on biobanked samples in batches LDL= low density lipoprotein. HDL=*  
210 *high density lipoprotein. SAA= serum amyloid A. CAC= circulating angiogenic cells.*  
211 *MP= microparticles. PF4= Platelet factor 4. t-PA= tissue plasminogen activator.*  
212 *TxA2=Thromboxane A. IL-6= Interleukin 6. CRP= C-reactive protein. PAI=-*  
213 *Plasminogen activator. s- ICAM- soluble intercellular adhesion protein inhibitor. s-*  
214 *VCAM= soluble vascular adhesion protein. TNFR1= Tumor necrosis factor receptor 1.*  
215 *MMP- Matrix metalloproteinase.*

### 216 **Non-Invasive Vascular Function Testing**

217 Smoking, is associated with endothelial damage and vascular dysfunction<sup>37 38</sup>.  
218 Endothelial cells are exposed to circulating toxins and measures of endothelial function  
219 are reflective of cardiovascular injury<sup>39</sup>. Thus, we examine the non-invasive endothelial  
220 vasodilator function using flow-mediated vasodilation<sup>40 41</sup>, arterial stiffness with carotid-  
221 femoral and carotid-radial pulse wave velocity<sup>42</sup>, and peripheral vascular function with

222 ankle brachial index. Flow mediated dilation was assessed with a 7.5MHZ ultrasound  
223 probe is used to image the brachial artery while a 10cm blood pressure cuff is attached  
224 to the lower arm and a 3 lead ECG is attached to the patient. After baseline images and  
225 10 cycles of Doppler images are captured using NIHEM R-wave triggered image  
226 capturing software, the blood pressure cuff is inflated to 200mmHg or 50mmHg higher  
227 than the systolic pressure. After the 5 minute occlusion, the cuff is released and the  
228 NIHEM software records two minutes of imaging. Images were analyzed by a single  
229 blinded analyzer using MIA vascular Research Tolls Brachial Analyzer for Research,  
230 version 6.8.5. All vascular imagers where trained at BU who have a previously reported  
231 reproducibility with intra- and inter-observer correlation coefficients of 0.98 and 0.99 for  
232 brachial diameter and 0.78 and 0.92 for FMD.<sup>43</sup> Similar equipment and software is used  
233 at both sites. All vascular studies are sent to the BU central lab for analysis.

### 234 **Anthropometric measures**

235 Anthropometric measures included height, weight, waist and hip circumference  
236 and body fat. All anthropometric measures are completed twice and the average  
237 recorded. Standing height measurements are completed on a fixed stadiometer. Weight  
238 measurements are completed on a digital scale to the nearest tenth of a pound. Waist  
239 circumference is measured at the level of the umbilicus to the nearest tenth of a  
240 centimeter. Hip circumference is measured at the maximal protrusion of the gluteal  
241 muscle to the nearest tenth of a centimeter. Body fat percentage is calculated by the  
242 bioelectrical impedance measured with the Omron fat loss monitor (HBF-306C).

### 243 **DATA ANALYSIS**

1  
2  
3 244 We expect that from this study we will be able to identify specific biomarkers of  
4  
5 245 cardiovascular injury due to tobacco use and the relationship of these biomarkers to  
6  
7 246 specific measures of tobacco exposure. For instance, we will identify which biomarkers  
8  
9  
10 247 are affected by tobacco use, and which ones are most sensitive; including their dose-  
11  
12 248 dependence. Additionally we will examine the extent to which biomarkers are  
13  
14 249 associated with exposure to nicotine versus exposure to HPHC of tobacco like  
15  
16  
17 250 aldehydes.

### 19 251 **Sample size**

21 252 The sample size is justified in terms of the primary dependent measure, FMD,  
22  
23 253 given the potential importance of this variable as a direct measure of the impact of  
24  
25 254 tobacco exposure. The main comparisons are between non-tobacco users and tobacco  
26  
27 255 users. Due to one control group, we will conservatively adjust our  $\alpha$  (significance level)  
28  
29 256 using a Bonferroni correction, and we will set  $\alpha=0.01$ . Based on preliminary data for  
30  
31 257 FMD, we have observed mean  $\pm$  SD in smoker and nonsmoker groups to be  $4.0 \pm 1.6$   
32  
33 258 and  $6.8 \pm 1.0$ , respectively. We consider at least 25% (mean FMD=3.0 from 4.0)  
34  
35 259 reduction from smokers to non-smokers is meaningful. Using a two sample, one-sided  $t$   
36  
37 260 test with an  $\alpha$  of 0.01 and 80% power ( $1-\beta$ ), assuming a common SD of 1.3, we will  
38  
39 261 need 34 evaluable subjects in each group. We will recruit a total of 120 tobacco using  
40  
41 262 participants per site. This over sampling will allow us to look at multiple endpoints and  
42  
43 263 for associations with VOCs.

### 49 264 **Analysis Plan**

51 265 All statistical analysis will be performed using SAS version 9.4 software (SAS  
52  
53 266 Institute, Inc., Cary, North Carolina), and a two-sided p-value of  $<0.05$  will be considered  
54  
55  
56  
57  
58  
59  
60

1  
2  
3 267 significant for any statistical test. Demographics and other baseline characteristics will  
4  
5 268 be summarized according to product group. Differences in VOC's between product  
6  
7 269 groups will be tested using ANOVA for normally distributed data or Kruskal-Wallis test  
8  
9 270 for non-normal data. The association between primary outcomes of vascular function  
10  
11 271 as well as circulating markers of cardiovascular injury with individual VOC levels will be  
12  
13 272 analyzed using multiple regression models, adjusting for appropriate confounders.  
14  
15 273 Additionally, because we have multiple VOC's, which are highly correlated, we will use  
16  
17 274 methods such as LASSO to identify the VOC's that are most associated with the  
18  
19 275 outcomes of interest. Multipollutant approaches, such as principal component analysis  
20  
21 276 (PCA), will be used to test whether overall VOC exposure is associated with the health  
22  
23 277 outcomes. Interaction variables will be tested for in the regression models and  
24  
25 278 subgroup analyses will be conducted according to the following factors: significant  
26  
27 279 interactions, sex, age, race, tobacco product group. Multiple imputation method will be  
28  
29 280 used for missing data where appropriate. Sensitivity analysis using different analytic  
30  
31 281 approaches, such as generalized linear models, as well as considering different  
32  
33 282 covariate adjustments, will be used to build concordant results.  
34  
35  
36  
37  
38  
39

40 283 The dose-dependence of the changes in biomarkers will be determined by  
41  
42 284 analyzing the data obtained from individuals that are exposed to different doses of a  
43  
44 285 single product (e.g. smoking 0, <10, 10-20 and >20 cigarettes per day) and by  
45  
46 286 comparing between tobacco products that have different doses of HPHC constituents.  
47  
48 287 In the US the average cigarettes per day is between 10-20<sup>44</sup> and therefore this dose  
49  
50 288 range distribution is reflective of general population exposure. Comparisons of the  
51  
52  
53  
54  
55  
56  
57  
58  
59  
60

1  
2  
3 289 effects of novel tobacco products and smoking will be informative of the relative toxicity  
4  
5 290 of the two products.  
6

7  
8 291 We believe that the methods employed in the current project are exquisitely  
9  
10 292 sensitive and responsive to even low dose insults such as ambient air pollution <sup>12</sup>  
11  
12 293 allowing us to quantify tobacco product-induced changes with high precision. Moreover,  
13  
14 294 levels of acrolein exposure vary between different individuals due to difference in puffing  
15  
16 295 intensity and the time a cigarette is left smoldering. Thus, direct measurements of  
17  
18 296 acrolein metabolites afford better estimates of acrolein exposure than machine yields.  
19  
20 297 We expect to obtain wide variations in acrolein/crotonaldehyde exposure which will  
21  
22 298 enable us to construct a dose-response relationship and identify which injury  
23  
24 299 biomarkers are associated with aldehyde exposure and whether high levels of exposure  
25  
26 300 are associated with high levels of injury, despite similar nicotine delivery.  
27  
28  
29

### 30 301 **ETHICS AND DISSEMINATION**

31  
32  
33 302 The CITU study was approved at each institution by their institutional review  
34  
35 303 board (BU #H-32613 and UofL #13.0590) and all participants provide written consent.  
36  
37 304 No study related procedures will be completed until after participant consent.  
38  
39

40 305 Participants for the CITU study are being recruited in both Boston, MA and  
41  
42 306 Louisville KY. The two populations show significant differences, therefore recruitment at  
43  
44 307 two sites will ensure a range more reflective of the general population. Although overall  
45  
46 308 racial and ethnic demographics for both cities show a clear majority of Caucasians  
47  
48 309 (70%) and despite smokers typically male, we strive to, and currently are successful in,  
49  
50 310 recruiting a population that was gender balanced and almost evenly split between  
51  
52 311 Caucasian and African Americans. Despite this balanced recruitment, e-cigarette users  
53  
54  
55  
56  
57  
58  
59  
60

1  
2  
3 312 have been reported as predominantly Caucasian and male<sup>45</sup>, and thus far our  
4  
5 313 recruitment mirrors these demographics. We expect very few Hispanic/Latino's to  
6  
7 314 participate, due to data suggesting tobacco use, including ENDS, tends to be lower  
8  
9 315 among Hispanic's/Latino's<sup>45 46</sup>. Thus we have also opted to only recruit English  
10  
11 316 speakers. We have carefully develop our recruitment strategy and exclusion criteria to  
12  
13 317 protect vulnerable populations, which is important since many report a lower  
14  
15 318 socioeconomic status and educational level in smokers in addition to higher rates of  
16  
17 319 reported alcohol and drug use<sup>47 48</sup>.

20  
21 320 Our study is an observational study where participants have already assumed  
22  
23 321 the risk of using tobacco. Study procedures pose minimal risk. Given the known harms  
24  
25 322 associated with smoking, we will provide information on tobacco treatment when  
26  
27 323 requested by the participant. Participant information is de-identified for analysis and  
28  
29 324 reported in aggregate to protect privacy.

30  
31 325 Completion of these studies will enable a greater understanding of the biological  
32  
33 326 responses to use of a variety of tobacco products. Specifically, they will help to identify  
34  
35 327 the constituents of these products; and how a panel of exposure and CV injury  
36  
37 328 biomarkers are associated with these different constituents. This data will be available  
38  
39 329 to the FDA and could help guide new policy measures to reduce or eliminate the  
40  
41 330 harmful components of tobacco smoke and other nicotine products. The study is  
42  
43 331 dedicated to the rapid dissemination of their rigorously characterized and well-controlled  
44  
45 332 research findings to the public in the form of peer-reviewed publications. Subsequent to  
46  
47 333 the initial full-length manuscript publications of the resources generated with funding  
48  
49 334 from this program, the study will make them available to interested and qualified  
50  
51  
52  
53  
54  
55  
56  
57  
58  
59  
60

1  
2  
3 335 investigators upon written request. The study will provide relevant protocols of published  
4  
5 336 data, upon request (presuming prior publication by the Center members). Participants  
6  
7 337 will be provided a summary of the results as they become available. Finally press  
8  
9 338 releases of relevant findings will inform the general population.  
10  
11  
12  
13

339

#### 340 **LIST OF ABBREVIATIONS**

341 ABI- Ankle Brachial Index

342 CAC= circulating angiogenic cells

343 CRP= C-reactive protein

344 CVD- Cardiovascular disease

345 ENDS- Electronic nicotine Device (i.e. e-cigarette)

346 FACS- Fluorescence-activated cell sorting

347 FMD- Flow mediated dilation

348 HDL= high density lipoprotein

349 IL-6= Interleukin 6

350 MMP- Matrix metalloproteinase

351 MP= micoparticles

352 PAI=- Plasminogen activator

353 PF4= Platelet factor 4

354 PWV- Pulse wave velocity

355 SAA= serum amyloid A

356 s-ICAM- soluble intercellular adhesion protein inhibitor

357 s-VCAM= soluble vascular adhesion protein



1  
2  
3 358 TNFR1= Tumor necrosis factor receptor 1  
4

5 359 t-PA= tissue plasminogen activator  
6

7  
8 360 TxA2=Thromboxane A  
9

10 361 VOC- Volatile organic compound  
11

12 362 W:H- ratio: Waist to hip ratio  
13  
14  
15 363

## 16 17 364 **AUTHORS CONTRIBUTIONS** 18

19 365 Rachel Keith- Study design, study recruitment, study visits, statistical analysis and  
20

21 366 manuscript preparation. Jessica Fetterman- study recruitment, study visits, manuscript  
22

23 367 preparation and editing. Dan Riggs- statistical analysis, manuscript preparation and  
24

25 368 editing. Tim O'Toole- Biomarker measurements, manuscript preparation and editing.  
26  
27

28 369 Jessica Nystoriak- study recruitment and study visits. Monica Holbrook- study  
29

30 370 recruitment and study visits. Pawel Lorkiewicz- VOC measurements and manuscript  
31

32 371 preparation. Aruni Bhatnagar- Study design, study funding and manuscript editing.  
33  
34

35 372 Andrew DeFilippis- Human subject assessment planning, manuscript preparation and  
36

37 373 editing. Naomi M. Hamburg- Study design, study funding, vascular core, manuscript  
38

39 374 preparation and editing.  
40  
41

## 42 375 **COMPETING INTERESTS** 43

44 376 None declared  
45  
46

## 47 377 **FUNDING** 48

49 378 This work was supported by the National Institutes of Health and the FDA Center for  
50

51 379 Tobacco Products (CTP) grant number P50HL120163.  
52  
53

## 54 380 **Acknowledgements** 55 56 57 58 59 60

1  
2  
3 381 Study design reported in this publication was supported by the AHA Tobacco  
4  
5 382 Regulation and Addiction Center (A-TRAC) and FDA Center for Tobacco Products  
6  
7  
8 383 (CTP). The content is solely the responsibility of the authors and does not necessarily  
9  
10 384 represent the official views of the NIH or the Food and Drug Administration.  
11

## 12 385 REFERENCES

- 13  
14  
15 386 1. Rostron B. Smoking-Attributable Mortality by Cause in the United States: Revising the CDC's Data and  
16 387 Estimates. *Nicotine Tob Res* 2013;15(1):238-46. doi: 10.1093/ntr/nts120
- 17 388 2. Morris PB, Ference BA, Jahangir E, et al. Cardiovascular Effects of Exposure to Cigarette Smoke and  
18 389 Electronic Cigarettes: Clinical Perspectives From the Prevention of Cardiovascular Disease  
19 390 Section Leadership Council and Early Career Councils of the American College of Cardiology. *J*  
20 391 *Am Coll Cardiol* 2015;66(12):1378-91. doi: 10.1016/j.jacc.2015.07.037 [published Online First:  
21 392 2015/09/19]
- 22 393 3. Haussmann HJ. Use of hazard indices for a theoretical evaluation of cigarette smoke composition.  
23 394 *Chem Res Toxicol* 2012;25(4):794-810. doi: 10.1021/tx200536w [published Online First:  
24 395 2012/02/23]
- 25 396 4. Ghilarducci DP, Tjeerdema RS. Fate and effects of acrolein. *Rev Environ Contam Toxicol* 1995;144:95-  
26 397 146. [published Online First: 1995/01/01]
- 27 398 5. Dong JZ, Moldoveanu SC. Gas chromatography-mass spectrometry of carbonyl compounds in  
28 399 cigarette mainstream smoke after derivatization with 2,4-dinitrophenylhydrazine. *J Chromatogr*  
29 400 *A* 2004;1027(1-2):25-35. [published Online First: 2004/02/20]
- 30 401 6. Stepanov I, Jensen J, Hatsukami D, et al. New and traditional smokeless tobacco: comparison of  
31 402 toxicant and carcinogen levels. *Nicotine Tob Res* 2008;10(12):1773-82. doi:  
32 403 10.1080/14622200802443544 [published Online First: 2008/11/22]
- 33 404 7. Awe SO, Adeagbo AS, D'Souza SE, et al. Acrolein induces vasodilatation of rodent mesenteric bed via  
34 405 an EDHF-dependent mechanism. *Toxicol Appl Pharmacol* 2006;217(3):266-76. doi:  
35 406 10.1016/j.taap.2006.08.008 [published Online First: 2006/10/31]
- 36 407 8. Conklin DJ, Barski OA, Lesgards JF, et al. Acrolein consumption induces systemic dyslipidemia and  
37 408 lipoprotein modification. *Toxicol Appl Pharmacol* 2010;243(1):1-12. doi:  
38 409 10.1016/j.taap.2009.12.010 [published Online First: 2009/12/26]
- 39 410 9. Conklin DJ, Bhatnagar A, Cowley HR, et al. Acrolein generation stimulates hypercontraction in isolated  
40 411 human blood vessels. *Toxicol Appl Pharmacol* 2006;217(3):277-88. doi:  
41 412 10.1016/j.taap.2006.09.009 [published Online First: 2006/11/11]
- 42 413 10. Conklin DJ, Haberzettl P, Prough RA, et al. Glutathione-S-transferase P protects against endothelial  
43 414 dysfunction induced by exposure to tobacco smoke. *Am J Physiol Heart Circ Physiol*  
44 415 2009;296(5):H1586-97. doi: 10.1152/ajpheart.00867.2008 [published Online First: 2009/03/10]
- 45 416 11. Ismahil MA, Hamid T, Haberzettl P, et al. Chronic oral exposure to the aldehyde pollutant acrolein  
46 417 induces dilated cardiomyopathy. *Am J Physiol Heart Circ Physiol* 2011;301(5):H2050-60. doi:  
47 418 10.1152/ajpheart.00120.2011 [published Online First: 2011/09/13]
- 48 419 12. O'Toole TE, Hellmann J, Wheat L, et al. Episodic exposure to fine particulate air pollution decreases  
49 420 circulating levels of endothelial progenitor cells. *Circ Res* 2010;107(2):200-3. doi:  
50 421 10.1161/circresaha.110.222679 [published Online First: 2010/07/03]

- 1  
2  
3 422 13. O'Toole TE, Zheng YT, Hellmann J, et al. Acrolein activates matrix metalloproteinases by increasing  
4 423 reactive oxygen species in macrophages. *Toxicol Appl Pharmacol* 2009;236(2):194-201. doi:  
5 424 10.1016/j.taap.2009.01.024 [published Online First: 2009/04/18]  
6  
7 425 14. Sithu SD, Srivastava S, Siddiqui MA, et al. Exposure to acrolein by inhalation causes platelet  
8 426 activation. *Toxicol Appl Pharmacol* 2010;248(2):100-10. doi: 10.1016/j.taap.2010.07.013  
9 427 [published Online First: 2010/08/04]  
10 428 15. Srivastava S, Sithu SD, Vladykovskaya E, et al. Oral exposure to acrolein exacerbates atherosclerosis  
11 429 in apoE-null mice. *Atherosclerosis* 2011;215(2):301-8. doi: 10.1016/j.atherosclerosis.2011.01.001  
12 430 [published Online First: 2011/03/05]  
13 431 16. Tsakadze NL, Srivastava S, Awe SO, et al. Acrolein-induced vasomotor responses of rat aorta. *Am J*  
14 432 *Physiol Heart Circ Physiol* 2003;285(2):H727-34. doi: 10.1152/ajpheart.00269.2003 [published  
15 433 Online First: 2003/05/06]  
16 434 17. Wang GW, Guo Y, Vondriska TM, et al. Acrolein consumption exacerbates myocardial ischemic injury  
17 435 and blocks nitric oxide-induced PKCepsilon signaling and cardioprotection. *J Mol Cell Cardiol*  
18 436 2008;44(6):1016-22. doi: 10.1016/j.yjmcc.2008.03.020 [published Online First: 2008/05/13]  
19 437 18. Wheat LA, Haberzettl P, Hellmann J, et al. Acrolein inhalation prevents vascular endothelial growth  
20 438 factor-induced mobilization of Flk-1+/Sca-1+ cells in mice. *Arterioscler Thromb Vasc Biol*  
21 439 2011;31(7):1598-606. doi: 10.1161/atvbaha.111.227124 [published Online First: 2011/04/30]  
22 440 19. WHO Study Group on Tobacco Product Regulation. Report on the scientific basic of tobacco product  
23 441 regulation: fourth report of a WHO study group. *World Health Organ Tech Rep Ser* 2012(967):1-  
24 442 83, 1 p following 83. [published Online First: 2012/09/08]  
25 443 20. De Woskin R, Greenberg M, Pepelko W, et al. Toxicological review of acrolein (cas no. 107-02-08) in  
26 444 support of summary information on the integrated risk information system (Iris). *Washington,*  
27 445 *DC: US Environmental Protection Agency* 2003  
28 446 21. Kosmider L, Sobczak A, Fik M, et al. Carbonyl compounds in electronic cigarette vapors: effects of  
29 447 nicotine solvent and battery output voltage. *Nicotine Tob Res* 2014;16(10):1319-26. doi:  
30 448 10.1093/ntr/ntu078 [published Online First: 2014/05/17]  
31 449 22. Goniewicz ML, Knysak J, Gawron M, et al. Levels of selected carcinogens and toxicants in vapour  
32 450 from electronic cigarettes. *Tob Control* 2014;23(2):133-9. doi: 10.1136/tobaccocontrol-2012-  
33 451 050859 [published Online First: 2013/03/08]  
34 452 23. Wang P, Chen W, Liao J, et al. A Device-Independent Evaluation of Carbonyl Emissions from Heated  
35 453 Electronic Cigarette Solvents. *PLoS One* 2017;12(1):e0169811. doi:  
36 454 10.1371/journal.pone.0169811 [published Online First: 2017/01/12]  
37 455 24. Hill JM, Zalos G, Halcox JP, et al. Circulating endothelial progenitor cells, vascular function, and  
38 456 cardiovascular risk. *The New England journal of medicine* 2003;348(7):593-600. doi:  
39 457 10.1056/NEJMoa022287 [published Online First: 2003/02/14]  
40 458 25. Parsons VL, Moriarity C, Jonas K, et al. Design and estimation for the national health interview  
41 459 survey, 2006-2015. *Vital Health Stat 2* 2014(165):1-53. [published Online First: 2014/04/30]  
42 460 26. Raysoni AU, Stock TH, Sarnat JA, et al. Evaluation of VOC concentrations in indoor and outdoor  
43 461 microenvironments at near-road schools. *Environ Pollut* 2017;231(Pt 1):681-93. doi:  
44 462 10.1016/j.envpol.2017.08.065 [published Online First: 2017/08/30]  
45 463 27. Boyle EB, Viet SM, Wright DJ, et al. Assessment of Exposure to VOCs among Pregnant Women in the  
46 464 National Children's Study. *Int J Environ Res Public Health* 2016;13(4):376. doi:  
47 465 10.3390/ijerph13040376 [published Online First: 2016/04/05]  
48 466 28. Jain RB. Distributions of selected urinary metabolites of volatile organic compounds by age, gender,  
49 467 race/ethnicity, and smoking status in a representative sample of U.S. adults. *Environ Toxicol*  
50 468 *Pharmacol* 2015;40(2):471-9. doi: 10.1016/j.etap.2015.07.018 [published Online First:  
51 469 2015/08/19]  
52  
53  
54  
55  
56  
57  
58  
59  
60

- 1  
2  
3 470 29. Sarkar M, Muhammad-Kah R, Liang Q, et al. Evaluation of spot urine as an alternative to 24h urine  
4 471 collection for determination of biomarkers of exposure to cigarette smoke in adult smokers.  
5 472 *Environ Toxicol Pharmacol* 2013;36(1):108-14. doi: 10.1016/j.etap.2013.03.001 [published  
6 473 Online First: 2013/04/23]
- 8 474 30. Benowitz NL, Jacob P. Nicotine and cotinine elimination pharmacokinetics in smokers and  
9 475 nonsmokers. *Clin Pharmacol Ther* 1993;53(3):316-23.
- 10 476 31. Fuhr U, Boettcher MI, Kinzig-Schippers M, et al. Toxicokinetics of acrylamide in humans after  
11 477 ingestion of a defined dose in a test meal to improve risk assessment for acrylamide  
12 478 carcinogenicity. *Cancer Epidemiol Biomarkers Prev* 2006;15(2):266-71. doi: 10.1158/1055-  
13 479 9965.epi-05-0647 [published Online First: 2006/02/24]
- 14 480 32. DeJarnett N, Conklin DJ, Riggs DW, et al. Acrolein exposure is associated with increased  
15 481 cardiovascular disease risk. *J Am Heart Assoc* 2014;3(4) doi: 10.1161/jaha.114.000934  
16 482 [published Online First: 2014/08/08]
- 18 483 33. Alwis KU, Blount BC, Britt AS, et al. Simultaneous analysis of 28 urinary VOC metabolites using ultra  
19 484 high performance liquid chromatography coupled with electrospray ionization tandem mass  
20 485 spectrometry (UPLC-ESI/MSMS). *Anal Chim Acta* 2012;750:152-60. doi:  
21 486 10.1016/j.aca.2012.04.009 [published Online First: 2012/10/16]
- 22 487 34. Vasa M, Fichtlscherer S, Aicher A, et al. Number and migratory activity of circulating endothelial  
23 488 progenitor cells inversely correlate with risk factors for coronary artery disease. *Circ Res*  
24 489 2001;89(1):E1-7. [published Online First: 2001/07/07]
- 26 490 35. Werner N, Nickenig G. Influence of cardiovascular risk factors on endothelial progenitor cells:  
27 491 limitations for therapy? *Arterioscler Thromb Vasc Biol* 2006;26(2):257-66. doi:  
28 492 10.1161/01.ATV.0000198239.41189.5d [published Online First: 2005/12/03]
- 29 493 36. DeJarnett N, Yeager R, Conklin DJ, et al. Residential Proximity to Major Roadways Is Associated With  
30 494 Increased Levels of AC133+ Circulating Angiogenic Cells. *Arteriosclerosis, thrombosis, and*  
31 495 *vascular biology* 2015;35(11):2468-77. doi: 10.1161/atvbaha.115.305724 [published Online First:  
32 496 2015/08/22]
- 33 497 37. Poredos P, Orehek M, Tratnik E. Smoking is associated with dose-related increase of intima-media  
34 498 thickness and endothelial dysfunction. *Angiology* 1999;50(3):201-8. [published Online First:  
35 499 1999/03/24]
- 37 500 38. Heiss C, Amabile N, Lee AC, et al. Brief secondhand smoke exposure depresses endothelial  
38 501 progenitor cells activity and endothelial function: sustained vascular injury and blunted nitric  
39 502 oxide production. *J Am Coll Cardiol* 2008;51(18):1760-71. doi: 10.1016/j.jacc.2008.01.040  
40 503 [published Online First: 2008/05/03]
- 41 504 39. Flammer AJ, Anderson T, Celermajer DS, et al. The assessment of endothelial function: from research  
42 505 into clinical practice. *Circulation* 2012;126(6):753-67. doi: 10.1161/circulationaha.112.093245  
43 506 [published Online First: 2012/08/08]
- 44 507 40. Benjamin EJ, Larson MG, Keyes MJ, et al. Clinical correlates and heritability of flow-mediated dilation  
45 508 in the community: the Framingham Heart Study. *Circulation* 2004;109(5):613-9. doi:  
46 509 10.1161/01.cir.0000112565.60887.1e [published Online First: 2004/02/11]
- 48 510 41. Vita JA. Nitric oxide-dependent vasodilation in human subjects. *Methods Enzymol* 2002;359:186-200.  
49 511 [published Online First: 2002/12/17]
- 50 512 42. Mitchell GF, Guo CY, Benjamin EJ, et al. Cross-sectional correlates of increased aortic stiffness in the  
51 513 community: the Framingham Heart Study. *Circulation* 2007;115(20):2628-36. doi:  
52 514 10.1161/circulationaha.106.667733 [published Online First: 2007/05/09]
- 53 515 43. Duffy SJ, Keaney Jr JF, Holbrook M, et al. Short-and long-term black tea consumption reverses  
54 516 endothelial dysfunction in patients with coronary artery disease. *Circulation* 2001;104(2):151-  
55 517 56.

- 1  
2  
3 518 44. Benowitz NL, Dains KM, Dempsey D, et al. Racial differences in the relationship between number of  
4 519 cigarettes smoked and nicotine and carcinogen exposure. *Nicotine Tob Res* 2011;13(9):772-83.  
5 520 doi: 10.1093/ntr/ntr072 [published Online First: 2011/05/07]  
6  
7 521 45. Schoenborn CA, Gindi RM. Electronic Cigarette Use Among Adults: United States, 2014. *NCHS Data*  
8 522 *Brief* 2015(217):1-8. [published Online First: 2015/11/12]  
9 523 46. Maher J, Boysun M, Rohde K, et al. Are Latinos really less likely to be smokers? Lessons from Oregon.  
10 524 *Nicotine & Tobacco Research* 2005;7(2):283-87. doi: 10.1080/14622200500056259  
11 525 47. Barbeau EM, Krieger N, Soobader M-J. Working Class Matters: Socioeconomic Disadvantage,  
12 526 Race/Ethnicity, Gender, and Smoking in NHIS 2000. *Am J Public Health* 2004;94(2):269-78. doi:  
13 527 10.2105/AJPH.94.2.269  
14 528 48. Giskes K, Kunst AE, Benach J, et al. Trends in smoking behaviour between 1985 and 2000 in nine  
15 529 European countries by education. *Journal of Epidemiology and Community Health*  
16 530 2005;59(5):395.

### 18 531 **Figure 1. Cardiovascular Injury due to Tobacco Use**

20  
21 532 CITU is designed to assess how tobacco related VOC exposure contributes to  
22 533 cardiovascular risk factors. Our exposure measurements include a panel of 23  
23 534 urinary metabolites of 18 parent VOCs and tobacco use patterns. Cardiovascular  
24 535 phenotyping includes measures of injury, risk, vascular biomarkers and early  
25 536 vascular dysfunction. Tobacco use included use of traditional cigarettes,  
26 537 smokeless tobacco, waterpipe tobacco (hookah), electronic nicotine devices  
27 538 (ENDS), little cigars, cigarillos, pipes, cigars or any other form of tobacco that is  
28 539 available. Enrollment began in July 2014 and is ongoing.

### 30 540 **Figure 2. Study Visit Design**

31  
32 541 Study flow chart for interested participants from screening through study completion.  
33 542 Potential participants are pre-screened for eligibility prior to enrollment. Potential  
34 543 participants are asked to fast from tobacco for a minimum of 6 hours prior to the  
35 544 study visit. On the day of the visit the study lasts approximately 90 minute.

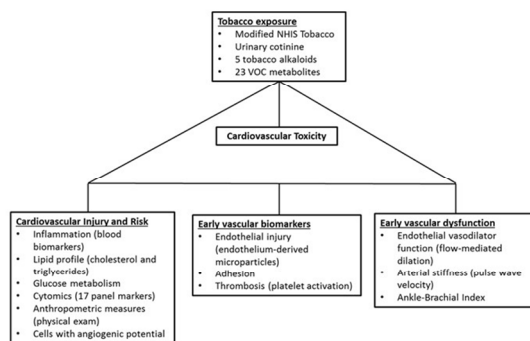

CITU is designed to assess how tobacco related VOC exposure contributes to cardiovascular risk factors. Our exposure measurements include a panel of 23 urinary metabolites of 18 parent VOCs and tobacco use patterns. Cardiovascular phenotyping includes measures of injury, risk, vascular biomarkers and early vascular dysfunction. Tobacco use included use of traditional cigarettes, smokeless tobacco, waterpipe tobacco (hookah), electronic nicotine devices (ENDS), little cigars, cigarillos, pipes, cigars or any other form of tobacco that is available. Enrollment began in July 2014 and is ongoing.

108x60mm (300 x 300 DPI)

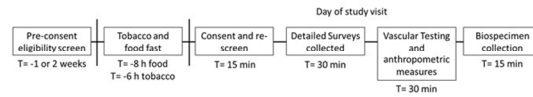

Study flow chart for interested participants from screening through study completion. Potential participants are pre-screened for eligibility prior to enrollment. Potential participants are asked to fast from tobacco for a minimum of 6 hours prior to the study visit. On the day of the visit the study lasts approximately 90 minutes.

108x60mm (300 x 300 DPI)

**STROBE 2007 (v4) Statement—Checklist of items that should be included in reports of *cohort studies***

| Section/Topic                | Item # | Recommendation                                                                                                                                                                       | Reported on page #   |
|------------------------------|--------|--------------------------------------------------------------------------------------------------------------------------------------------------------------------------------------|----------------------|
| Title and abstract           | 1      | (a) Indicate the study's design with a commonly used term in the title or the abstract                                                                                               | 1                    |
|                              |        | (b) Provide in the abstract an informative and balanced summary of what was done and what was found                                                                                  | 2-3                  |
| <b>Introduction</b>          |        |                                                                                                                                                                                      |                      |
| Background/rationale         | 2      | Explain the scientific background and rationale for the investigation being reported                                                                                                 | 3-4                  |
| Objectives                   | 3      | State specific objectives, including any prespecified hypotheses                                                                                                                     | 5                    |
| <b>Methods</b>               |        |                                                                                                                                                                                      |                      |
| Study design                 | 4      | Present key elements of study design early in the paper                                                                                                                              | 5, 7                 |
| Setting                      | 5      | Describe the setting, locations, and relevant dates, including periods of recruitment, exposure, follow-up, and data collection                                                      | 5, 7                 |
| Participants                 | 6      | (a) Give the eligibility criteria, and the sources and methods of selection of participants. Describe methods of follow-up                                                           | 6-7                  |
|                              |        | (b) For matched studies, give matching criteria and number of exposed and unexposed                                                                                                  | N/A                  |
| Variables                    | 7      | Clearly define all outcomes, exposures, predictors, potential confounders, and effect modifiers. Give diagnostic criteria, if applicable                                             | 7-12                 |
| Data sources/<br>measurement | 8*     | For each variable of interest, give sources of data and details of methods of assessment (measurement). Describe comparability of assessment methods if there is more than one group | 7-12                 |
| Bias                         | 9      | Describe any efforts to address potential sources of bias                                                                                                                            | 7                    |
| Study size                   | 10     | Explain how the study size was arrived at                                                                                                                                            | 14-16                |
| Quantitative variables       | 11     | Explain how quantitative variables were handled in the analyses. If applicable, describe which groupings were chosen and why                                                         | 12-14                |
| Statistical methods          | 12     | (a) Describe all statistical methods, including those used to control for confounding                                                                                                | 12-14                |
|                              |        | (b) Describe any methods used to examine subgroups and interactions                                                                                                                  | 13                   |
|                              |        | (c) Explain how missing data were addressed                                                                                                                                          | 13                   |
|                              |        | (d) If applicable, explain how loss to follow-up was addressed                                                                                                                       | N/A (study protocol) |
|                              |        | (e) Describe any sensitivity analyses                                                                                                                                                | 13                   |
| <b>Results</b>               |        |                                                                                                                                                                                      |                      |



|                          |     |                                                                                                                                                                                                              |                      |
|--------------------------|-----|--------------------------------------------------------------------------------------------------------------------------------------------------------------------------------------------------------------|----------------------|
| Participants             | 13* | (a) Report numbers of individuals at each stage of study—eg numbers potentially eligible, examined for eligibility, confirmed eligible, included in the study, completing follow-up, and analysed            | N/A (study protocol) |
|                          |     | (b) Give reasons for non-participation at each stage                                                                                                                                                         | N/A (study protocol) |
|                          |     | (c) Consider use of a flow diagram                                                                                                                                                                           | N/A (study protocol) |
| Descriptive data         | 14* | (a) Give characteristics of study participants (eg demographic, clinical, social) and information on exposures and potential confounders                                                                     | N/A (study protocol) |
|                          |     | (b) Indicate number of participants with missing data for each variable of interest                                                                                                                          | N/A (study protocol) |
|                          |     | (c) Summarise follow-up time (eg, average and total amount)                                                                                                                                                  | N/A (study protocol) |
| Outcome data             | 15* | Report numbers of outcome events or summary measures over time                                                                                                                                               | N/A (study protocol) |
| Main results             | 16  | (a) Give unadjusted estimates and, if applicable, confounder-adjusted estimates and their precision (eg, 95% confidence interval). Make clear which confounders were adjusted for and why they were included | N/A (study protocol) |
|                          |     | (b) Report category boundaries when continuous variables were categorized                                                                                                                                    | N/A (study protocol) |
|                          |     | (c) If relevant, consider translating estimates of relative risk into absolute risk for a meaningful time period                                                                                             | N/A (study protocol) |
| Other analyses           | 17  | Report other analyses done—eg analyses of subgroups and interactions, and sensitivity analyses                                                                                                               | N/A (study protocol) |
| <b>Discussion</b>        |     |                                                                                                                                                                                                              |                      |
| Key results              | 18  | Summarise key results with reference to study objectives                                                                                                                                                     | N/A (study protocol) |
| <b>Limitations</b>       |     |                                                                                                                                                                                                              |                      |
| Interpretation           | 20  | Give a cautious overall interpretation of results considering objectives, limitations, multiplicity of analyses, results from similar studies, and other relevant evidence                                   | 17                   |
| Generalisability         | 21  | Discuss the generalisability (external validity) of the study results                                                                                                                                        |                      |
| <b>Other information</b> |     |                                                                                                                                                                                                              |                      |
| Funding                  | 22  | Give the source of funding and the role of the funders for the present study and, if applicable, for the original study on which the present article is based                                                | 19                   |

\*Give information separately for cases and controls in case-control studies and, if applicable, for exposed and unexposed groups in cohort and cross-sectional studies.

**Note:** An Explanation and Elaboration article discusses each checklist item and gives methodological background and published examples of transparent reporting. The STROBE checklist is best used in conjunction with this article (freely available on the Web sites of PLoS Medicine at <http://www.plosmedicine.org/>, Annals of Internal Medicine at <http://www.annals.org/>, and Epidemiology at <http://www.epidem.com/>). Information on the STROBE Initiative is available at [www.strobe-statement.org](http://www.strobe-statement.org).
